# Supplementary material
Source: publisher site journal article supplement (https://www.dovepress.com/article/612867)
Supplement: Supplementary file 1 [file 612867_Appendix%201-7.docx]

**Appendix 1. Search strategy**

#1 Chronic Prostatitis
("Chronic Prostatitis"[MeSH] OR "Chronic Prostatitis"[Title/Abstract] OR "Chronic Pelvic Pain Syndrome"[Title/Abstract] OR "CPPS"[Title/Abstract] OR "CP/CPPS"[Title/Abstract] OR "Type III Prostatitis"[Title/Abstract] OR "Chronic Bacterial Prostatitis"[Title/Abstract])

#2 Acupuncture-Related Interventions
("Acupuncture Therapy"[MeSH] OR "Acupuncture"[Title/Abstract] OR "Electroacupuncture"[MeSH] OR "Electroacupuncture"[Title/Abstract] OR "Moxibustion"[MeSH] OR "Moxibustion"[Title/Abstract] OR "Warm Needling"[Title/Abstract] OR "Heat-sensitive Moxibustion"[Title/Abstract] OR "Catgut Embedding"[Title/Abstract] OR "Acupoint Catgut Embedding"[Title/Abstract] OR "Acupoint Application Therapy"[Title/Abstract] OR "Press Needle"[Title/Abstract] OR "Manual Acupuncture"[Title/Abstract] OR "Grain-sized Moxibustion"[Title/Abstract] OR "Indirect Moxibustion"[Title/Abstract] OR "Medicine, Chinese Traditional"[MeSH] OR "Chinese Herbal Medicine"[Title/Abstract])

#3 Study Type: Randomized Controlled Trials
("Randomized Controlled Trial" [Publication Type] OR "Randomized Controlled Trials as Topic"[MeSH] OR "randomized"[Title/Abstract] OR "randomly"[Title/Abstract] OR "RCT"[Title/Abstract])

Final Combination:
#1 AND #2 AND #3

**Appendix 2. Risk-of-bias assessment**

**Table S1.**Risk of bias of randomized clinical trials.

| | Study | Randomization process | | Deviations from intended interventions | Missing outcome data | Measurement of the outcome | Selection of the reported result | Overall Risk of Bias | | --- | --- | --- | --- | --- | --- | --- | --- | | Sui 201735 | | some concerns | some concerns | low | low | low | high | | Ou 202036 | | low | some concerns | low | low | low | some concerns | | Xia 202037 | | low | some concerns | low | low | low | some concerns | | Xuan 201838 | | low | some concerns | low | low | low | some concerns | | Zhang 201039 | | low | some concerns | low | low | low | some concerns | | Cao 202240 | | low | some concerns | low | low | low | some concerns | | Song 202141 | | low | some concerns | low | low | low | some concerns | | Liang 202042 | | low | some concerns | low | low | low | some concerns | | Zhou 202543 | | low | some concerns | low | low | low | some concerns | | Zhou 201644 | | low | Some concerns | low | low | low | Some concerns | | Yong 202145 | | low | some concerns | low | low | low | high | | Yang 201446 | | low | some concerns | low | low | low | high | | Qiao 201647 | | low | some concerns | low | low | low | some concerns | | Chen 201148 | | some concerns | some concerns | low | low | low | high | | Zhu 201149 | | low | some concerns | low | low | low | some concerns | | Zeng 202150 | | some concerns | some concerns | low | low | low | high | | Wang 200751 | | some concerns | some concerns | low | low | low | high | | Liu 200952 | | low | some concerns | low | low | low | some concerns | | Liu 201153 | | low | Some concerns | low | low | low | Some concerns | | Kang 201554 | | low | some concerns | low | low | low | some concerns | | Shang 200855 | | low | some concerns | low | low | low | some concerns | | Chen 200956 | | low | some concerns | low | low | low | some concerns | | Ma 201657 | | low | some concerns | low | low | low | some concerns | | Cai 202058 | | some concerns | some concerns | low | low | low | high | | Gao 201659 | | some concerns | some concerns | low | low | low | high | | Wang 201760 | | low | some concerns | low | low | low | some concerns | | Song 201861 | | low | some concerns | low | low | low | some concerns | | Li 202462 | | some concerns | some concerns | low | low | low | high | | Zhou 201663 | | low | some concerns | low | low | low | some concerns | | Zhang 201764 | | low | Some concerns | low | low | low | Some concerns | | Yin 201965 | | low | some concerns | low | low | low | some concerns | | Zhang 202166 | | low | low | low | low | low | low | | Sun 200667 | | low | some concerns | low | low | low | some concerns | | Jiao 201668 | | low | some concerns | low | low | low | some concerns | | Gu 202469 | | low | some concerns | low | low | low | some concerns | | Pai 202370 | | low | some concerns | low | low | low | some concerns | | Yin 201771 | | low | some concerns | low | low | low | some concerns | | Liu 202372 | | low | some concerns | low | low | low | some concerns | | Zhang 200973 | | low | some concerns | low | low | low | some concerns | | Xu 201374 | | low | some concerns | low | low | low | some concerns | | Li 201575 | | low | some concerns | low | low | low | some concerns | | Gao 201676 | | low | some concerns | low | low | low | some concerns | | Huo 202077 | | low | some concerns | low | low | low | some concerns | | Wang 202178 | | low | some concerns | low | low | low | some concerns | | Hou 202179 | | low | some concerns | low | low | low | some concerns | |
| --- | --- | --- | --- | --- | --- | --- | --- | --- | --- | --- | --- | --- | --- | --- | --- | --- | --- | --- | --- | --- | --- | --- | --- | --- | --- | --- | --- | --- | --- | --- | --- | --- | --- | --- | --- | --- | --- | --- | --- | --- | --- | --- | --- | --- | --- | --- | --- | --- | --- | --- | --- | --- | --- | --- | --- | --- | --- | --- | --- | --- | --- | --- | --- | --- | --- | --- | --- | --- | --- | --- | --- | --- | --- | --- | --- | --- | --- | --- | --- | --- | --- | --- | --- | --- | --- | --- | --- | --- | --- | --- | --- | --- | --- | --- | --- | --- | --- | --- | --- | --- | --- | --- | --- | --- | --- | --- | --- | --- | --- | --- | --- | --- | --- | --- | --- | --- | --- | --- | --- | --- | --- | --- | --- | --- | --- | --- | --- | --- | --- | --- | --- | --- | --- | --- | --- | --- | --- | --- | --- | --- | --- | --- | --- | --- | --- | --- | --- | --- | --- | --- | --- | --- | --- | --- | --- | --- | --- | --- | --- | --- | --- | --- | --- | --- | --- | --- | --- | --- | --- | --- | --- | --- | --- | --- | --- | --- | --- | --- | --- | --- | --- | --- | --- | --- | --- | --- | --- | --- | --- | --- | --- | --- | --- | --- | --- | --- | --- | --- | --- | --- | --- | --- | --- | --- | --- | --- | --- | --- | --- | --- | --- | --- | --- | --- | --- | --- | --- | --- | --- | --- | --- | --- | --- | --- | --- | --- | --- | --- | --- | --- | --- | --- | --- | --- | --- | --- | --- | --- | --- | --- | --- | --- | --- | --- | --- | --- | --- | --- | --- | --- | --- | --- | --- | --- | --- | --- | --- | --- | --- | --- | --- | --- | --- | --- | --- | --- | --- | --- | --- | --- | --- | --- | --- | --- | --- | --- | --- | --- | --- | --- | --- | --- | --- | --- | --- | --- | --- | --- | --- | --- | --- | --- | --- | --- | --- | --- | --- | --- | --- | --- | --- | --- | --- | --- | --- | --- | --- | --- | --- | --- | --- | --- | --- | --- | --- | --- | --- | --- | --- | --- | --- | --- | --- | --- | --- | --- | --- | --- | --- | --- | --- | --- | --- | --- | --- | --- | --- | --- | --- | --- | --- | --- | --- | --- | --- | --- | --- | --- | --- | --- | --- | --- | --- | --- | --- | --- | --- | --- | --- | --- | --- | --- | --- | --- | --- | --- | --- | --- |

**Appendix 3.Consistency and Heterogeneity Assessment**

**Table S2.** Consistency and Heterogeneity Assessment.

| **Outcome** | **Consistency** | | **Heterogeneity**  （τ2） |
| --- | --- | --- | --- |
| Chi2 | *P* |
| NIH-CPSI Total Score | 17.1 | 0.5472 | 0.2994 |
| pain score | 0 | 0.9993 | 0.8622 |
| voiding score | 1.93 | 0.1646 | 0.5879 |
| quality of life score | 0.6072 | 0.26 | 0.7640 |
| Response rate | 8.22 | 0.5119 | 0.0037 |

**Table S3.** Node-splitting method for NIH-CPSI Total Score.

| Side | Direct | | Indirect | | Difference |  | P>|z| | τ² |
| --- | --- | --- | --- | --- | --- | --- | --- | --- |
| Coef. | Std.Err. | Coef. | Std.Err. | Coef. | Std.Err. |
| AAT vs. Y-CHM | -0.1107687 | 0.0930734 | -0.231059 | 0.1352988 | 0.1202903 | 0.1642285 | 0.464 | 0.003998 |
| AAT vs. Z-WM | -0.2058521 | 0.106684 | -0.0855603 | 0.1248581 | -0.1202918 | 0.1642286 | 0.464 | 0.003998 |
| EA vs. Y-CHM | -0.5744916 | 0.3716735 | -0.1063319 | 0.0854921 | -0.4681597 | 0.3814066 | 0.22 | 0.003659 |
| EA vs. Z-WM | -0.1285817 | 0.0471105 | -0.596724 | 0.3786239 | 0.4681423 | 0.3813989 | 0.22 | 0.003659 |
| EA+CHM vs. Y-CHM | -0.2115846 | 0.0565018 | -0.3323288 | 0.1860293 | 0.1207442 | 0.1944447 | 0.535 | 0.003899 |
| EA+CHM vs. Z-WM | -0.3184536 | 0.1688785 | -0.1977078 | 0.0963792 | -0.1207458 | 0.1944451 | 0.535 | 0.003899 |
| EA+WM vs. Z-WM | -0.0504017 | 0.0684793 | -0.2482714 | 115.272 | 0.1978697 | 115.272 | 0.999 | 0.003793 |
| MA vs. MOX | 0.0536529 | 0.1837025 | -0.084153 | 0.0800245 | 0.1378059 | 0.200947 | 0.493 | 0.004013 |
| MA vs. WMA | 0.21914 | 0.0718838 | 0.0767682 | 0.1162694 | 0.1423717 | 0.1415108 | 0.314 | 0.004445 |
| MA vs. Z-WM | -0.1272196 | 0.0424482 | -0.0708394 | 0.1215476 | -0.0563802 | 0.1290614 | 0.662 | 0.004477 |
| MA+CHM vs. Y-CHM | -0.1825711 | 0.0762487 | -0.1165812 | 99.54156 | -0.06599 | 99.54164 | 0.999 | 0.003793 |
| MOX vs. SMS | 0.1481251 | 0.0742054 | -0.0350842 | 0.1484366 | 0.1832094 | 0.1659841 | 0.27 | 0.004006 |
| MOX vs. WMA | 0.2762372 | 0.1460829 | 0.2240003 | 0.0975811 | 0.0522369 | 0.1741705 | 0.764 | 0.004224 |
| MOX vs. Z-WM | -0.0971149 | 0.0839336 | 0.0039272 | 0.1072701 | -0.101042 | 0.1352751 | 0.455 | 0.004162 |
| SMS vs. Y-CHM | -0.0991272 | 0.098897 | -0.2823367 | 0.1332537 | 0.1832095 | 0.1659846 | 0.27 | 0.004007 |
| WMA vs. Z-WM | -0.2732988 | 0.0887269 | -0.3232975 | 0.085199 | 0.0499987 | 0.1246687 | 0.688 | 0.004519 |
| WMA+CHM vs. Y-CHM | -0.2124047 | 0.0876402 | 0.0636765 | 0.1173791 | -0.2760811 | 0.1464196 | 0.059 | 0.002328 |
| WMA+CHM vs. Z-WM | -0.0246926 | 0.0852858 | -0.3007737 | 0.1190169 | 0.2760811 | 0.1464196 | 0.059 | 0.002328 |
| WMA+WM vs. Z-WM | -0.2657032 | 0.1345531 | -0.0445626 | 200.6799 | -0.2211405 | 200.68 | 0.999 | 0.003793 |

**Table S4.**Node-splitting method for Response rate.

| Side | Direct | | Indirect | | Difference | | P>|z| | τ² |
| --- | --- | --- | --- | --- | --- | --- | --- | --- |
| Coef. | Std.Err. | Coef. | Std.Err. | Coef. | Std.Err. |
| AAT vs. Y-CHM | -0.1107687 | 0.0930734 | -0.231059 | 0.1352988 | 0.1202903 | 0.1642285 | 0.464 | 0.003998 |
| AAT vs. Z-WM | -0.2058521 | 0.106684 | -0.0855603 | 0.1248581 | -0.1202918 | 0.1642286 | 0.464 | 0.003998 |
| EA vs. Y-CHM | -0.5744916 | 0.3716735 | -0.1063319 | 0.0854921 | -0.4681597 | 0.3814066 | 0.22 | 0.003659 |
| EA vs. Z-WM | -0.1285817 | 0.0471105 | -0.596724 | 0.3786239 | 0.4681423 | 0.3813989 | 0.22 | 0.003659 |
| EA+CHM vs. Y-CHM | -0.2115846 | 0.0565018 | -0.3323288 | 0.1860293 | 0.1207442 | 0.1944447 | 0.535 | 0.003899 |
| EA+CHM vs. Z-WM | -0.3184536 | 0.1688785 | -0.1977078 | 0.0963792 | -0.1207458 | 0.1944451 | 0.535 | 0.003899 |
| EA+WM vs. Z-WM | -0.0504017 | 0.0684793 | -0.2482714 | 115.272 | 0.1978697 | 115.272 | 0.999 | 0.003793 |
| MA vs. MOX | 0.0536529 | 0.1837025 | -0.084153 | 0.0800245 | 0.1378059 | 0.200947 | 0.493 | 0.004013 |
| MA vs. WMA | 0.21914 | 0.0718838 | 0.0767682 | 0.1162694 | 0.1423717 | 0.1415108 | 0.314 | 0.004445 |
| MA vs. Z-WM | -0.1272196 | 0.0424482 | -0.0708394 | 0.1215476 | -0.0563802 | 0.1290614 | 0.662 | 0.004477 |
| MA+CHM vs. Y-CHM | -0.1825711 | 0.0762487 | -0.1165812 | 99.54156 | -0.06599 | 99.54164 | 0.999 | 0.003793 |
| MOX vs. SMS | 0.1481251 | 0.0742054 | -0.0350842 | 0.1484366 | 0.1832094 | 0.1659841 | 0.27 | 0.004006 |
| MOX vs. WMA | 0.2762372 | 0.1460829 | 0.2240003 | 0.0975811 | 0.0522369 | 0.1741705 | 0.764 | 0.004224 |
| MOX vs. Z-WM | -0.0971149 | 0.0839336 | 0.0039272 | 0.1072701 | -0.101042 | 0.1352751 | 0.455 | 0.004162 |
| SMS vs. Y-CHM | -0.0991272 | 0.098897 | -0.2823367 | 0.1332537 | 0.1832095 | 0.1659846 | 0.27 | 0.004007 |
| WMA vs. Z-WM | -0.2732988 | 0.0887269 | -0.3232975 | 0.085199 | 0.0499987 | 0.1246687 | 0.688 | 0.004519 |
| WMA+CHM vs. Y-CHM | -0.2124047 | 0.0876402 | 0.0636765 | 0.1173791 | -0.2760811 | 0.1464196 | 0.059 | 0.002328 |
| WMA+CHM vs. Z-WM | -0.0246926 | 0.0852858 | -0.3007737 | 0.1190169 | 0.2760811 | 0.1464196 | 0.059 | 0.002328 |
| WMA+WM vs. Z-WM | -0.2657032 | 0.1345531 | -0.0445626 | 200.6799 | -0.2211405 | 200.68 | 0.999 | 0.003793 |

**Appendix 4. Funnel Plots**

**Figure S1.** Funnel plot of NIH-CPSI Total Score.

**
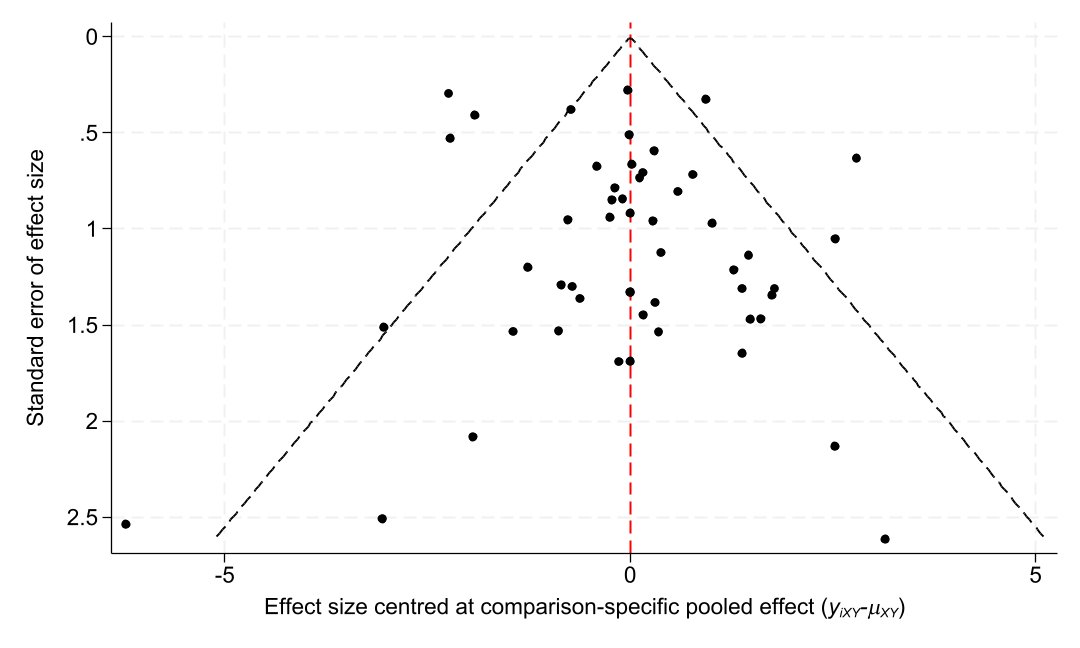
**

**Figure S2.** Funnel plot of pain score**.**

**
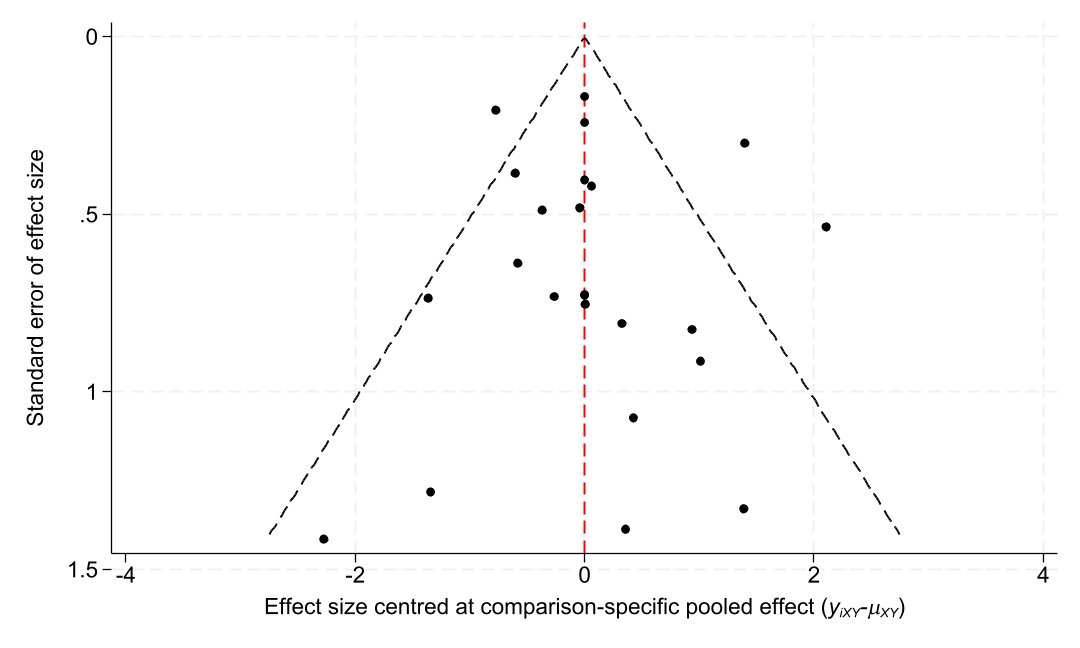
**

**Figure S3.** Funnel plot of voiding score.

**
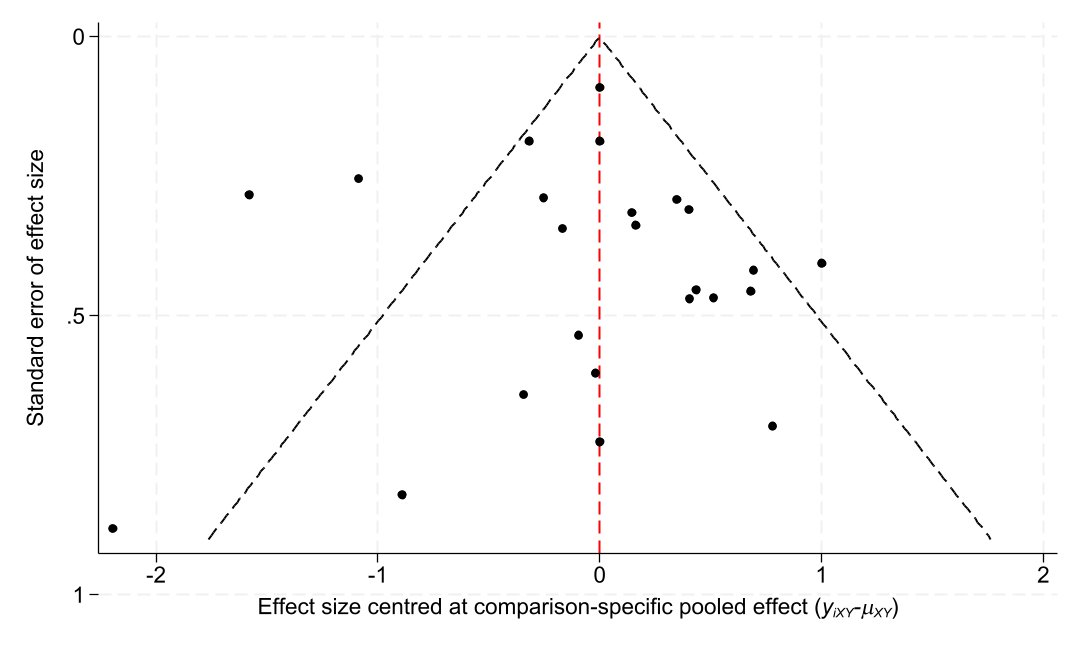
**

| **Figure S4.** Funnel plot of quality of life score**.** |
| --- |

**
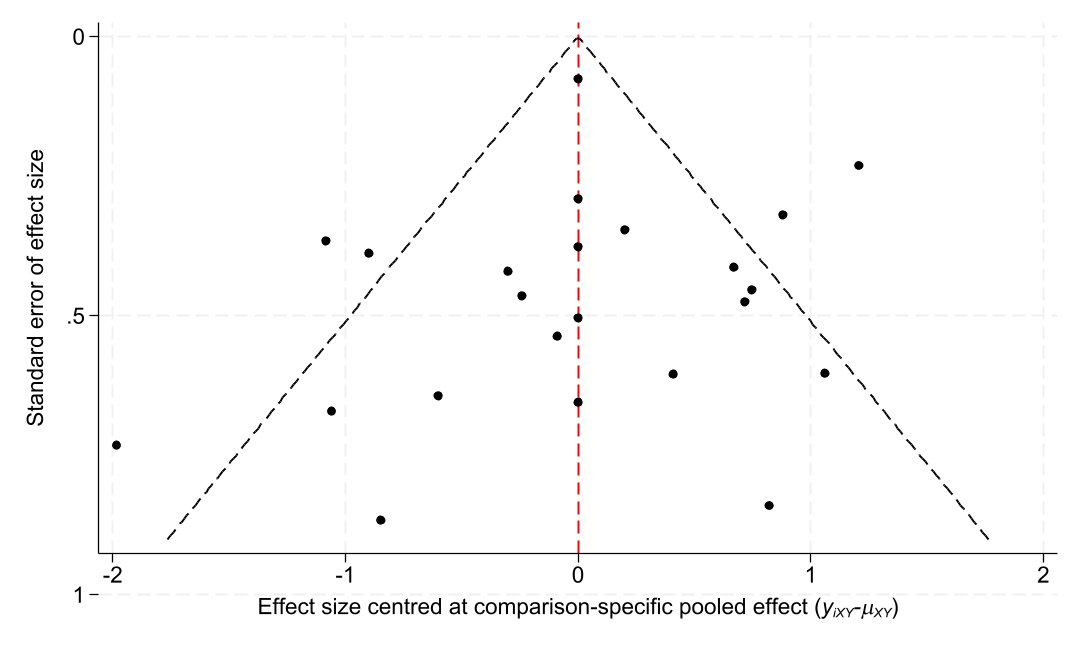
**

**Figure S5.** Funnel plot of Response rate.

**
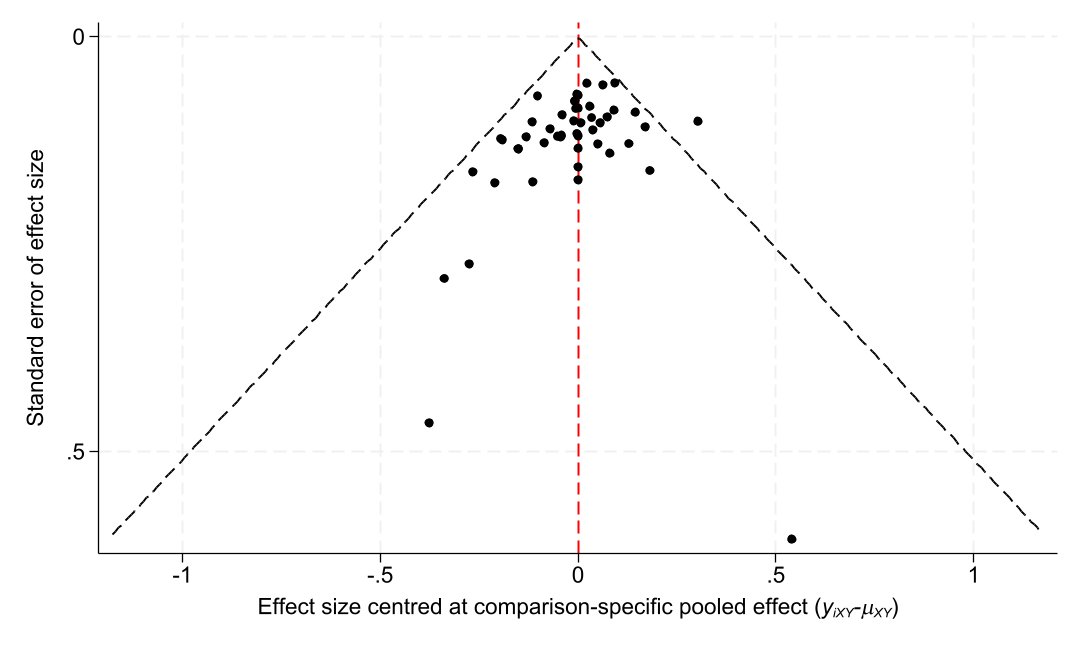
**

**Appendix 5.CINeMA Assessment**

**We use the CINeMA framework to evidence certainty, assessing it for each network estimate based on the following criteria:**

- **Within study bias:** We classified the overall risk of bias for each study as low risk of bias, the risk of bias as moderate when none of the four assessed risk of bias items were rated as high risk, and the risk of bias as high when one or both items were rated as high risk. See **Appendix 2** for the bias assessment. The risk of bias for a pairwise comparison of each drug is shown in **figure S5.1-5.12**.

**Figure S6.** Risk of bias contribution by intervention group in median NIH-CPSI total score.

**
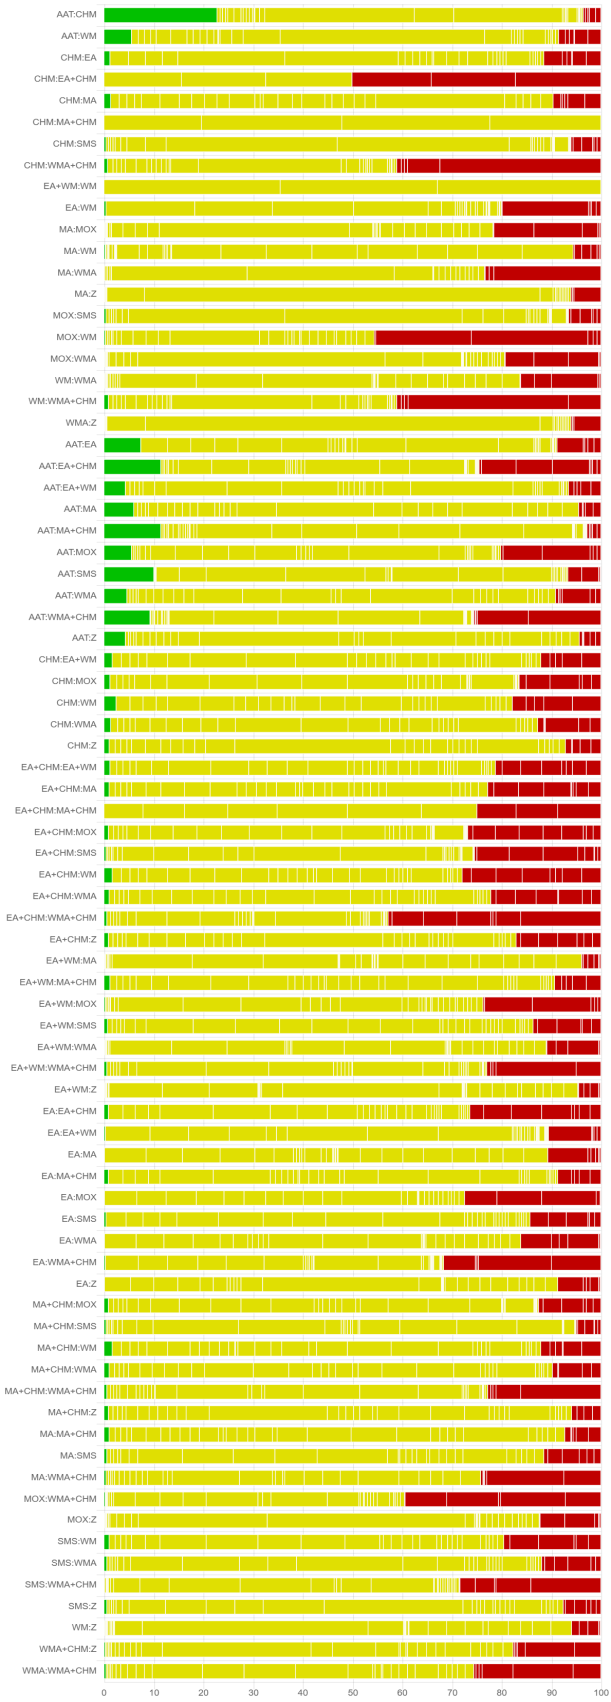

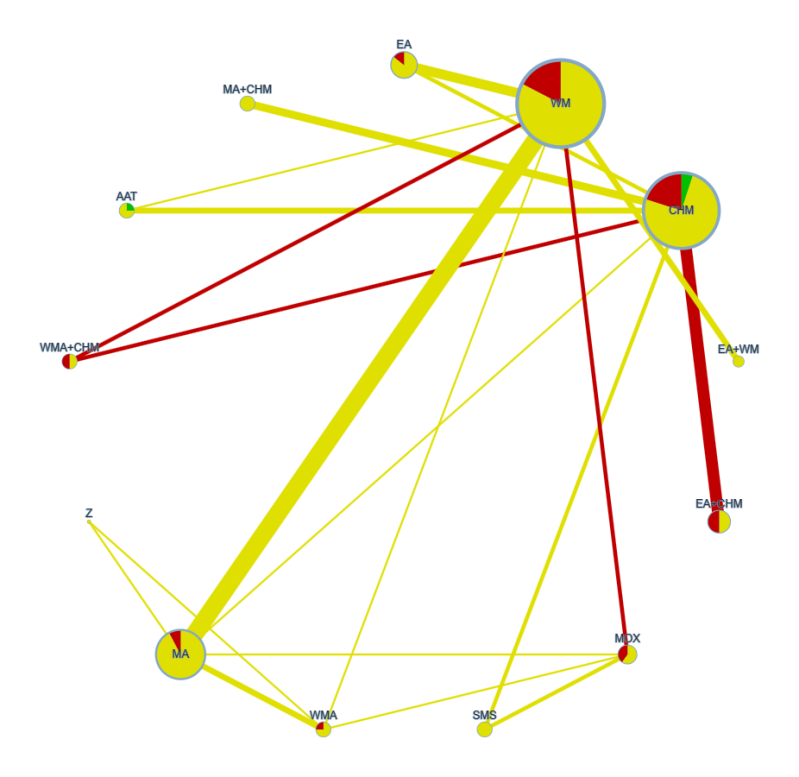
**

**Figure S7.** Overall risk of bias by treatment comparison in median NIH-CPSI total score.

**Table S5.**CINeMA results of NIH-CPSI total score.

| Comparison | Within-study bias | Reporting bias | Indirectness | Imprecision | Heterogeneity | Incoherence | Confidence rating |
| --- | --- | --- | --- | --- | --- | --- | --- |
| AAT:CHM | Some concerns | Low risk | No concerns | No concerns | No concerns | Major concerns | Low |
| AAT:WM | Some concerns | Low risk | No concerns | No concerns | No concerns | Major concerns | Low |
| CHM:EA | Some concerns | Low risk | No concerns | No concerns | Major concerns | Major concerns | Low |
| CHM:EA+CHM | Major concerns | Low risk | No concerns | No concerns | Major concerns | No concerns | Low |
| CHM:MA | Some concerns | Low risk | No concerns | No concerns | Major concerns | No concerns | Low |
| CHM:MA+CHM | Some concerns | Low risk | No concerns | No concerns | No concerns | No concerns | Moderate |
| CHM:SMS | Some concerns | Low risk | No concerns | No concerns | Major concerns | No concerns | Low |
| CHM:WMA+CHM | Some concerns | Low risk | No concerns | No concerns | Major concerns | No concerns | Low |
| EA:WM | Some concerns | Low risk | No concerns | No concerns | Major concerns | Major concerns | Low |
| EA+WM:WM | Some concerns | Low risk | No concerns | No concerns | Major concerns | No concerns | Low |
| MA:MOX | Some concerns | Low risk | No concerns | Major concerns | No concerns | No concerns | Low |
| MA:WM | Some concerns | Low risk | No concerns | No concerns | Major concerns | No concerns | Low |
| MA:WMA | Some concerns | Low risk | No concerns | No concerns | Major concerns | No concerns | Low |
| MA:Z | Some concerns | Low risk | No concerns | Major concerns | No concerns | No concerns | Low |
| MOX:SMS | Some concerns | Low risk | No concerns | Major concerns | No concerns | No concerns | Low |
| MOX:WM | Some concerns | Low risk | No concerns | Major concerns | No concerns | No concerns | Low |
| MOX:WMA | Some concerns | Low risk | No concerns | No concerns | Major concerns | No concerns | Low |
| WM:WMA | Some concerns | Low risk | No concerns | No concerns | No concerns | No concerns | High |
| WM:WMA+CHM | Some concerns | Low risk | No concerns | No concerns | Major concerns | No concerns | Low |
| WMA:Z | Some concerns | Low risk | No concerns | Major concerns | No concerns | No concerns | Low |
| AAT:EA | Some concerns | Low risk | No concerns | Major concerns | No concerns | No concerns | Low |
| AAT:EA+CHM | Some concerns | Low risk | No concerns | No concerns | Major concerns | No concerns | Low |
| AAT:EA+WM | Some concerns | Low risk | No concerns | Major concerns | No concerns | No concerns | High |
| AAT:MA | Some concerns | Low risk | No concerns | No concerns | Major concerns | No concerns | Low |
| AAT:MA+CHM | Some concerns | Low risk | No concerns | Major concerns | No concerns | No concerns | Low |
| AAT:MOX | Some concerns | Low risk | No concerns | No concerns | Major concerns | No concerns | Low |
| AAT:SMS | Some concerns | Low risk | No concerns | No concerns | Major concerns | No concerns | Low |
| AAT:WMA | Some concerns | Low risk | No concerns | Major concerns | No concerns | No concerns | High |
| AAT:WMA+CHM | Some concerns | Low risk | No concerns | No concerns | Major concerns | No concerns | Low |
| AAT:Z | Some concerns | Low risk | No concerns | Major concerns | No concerns | No concerns | High |
| CHM:EA+WM | Some concerns | Low risk | No concerns | No concerns | Major concerns | No concerns | Low |
| CHM:MOX | Some concerns | Low risk | No concerns | No concerns | Major concerns | No concerns | Low |
| CHM:WM | Some concerns | Low risk | No concerns | Major concerns | No concerns | No concerns | Low |
| CHM:WMA | Some concerns | Low risk | No concerns | No concerns | No concerns | No concerns | High |
| CHM:Z | Some concerns | Low risk | No concerns | No concerns | Major concerns | No concerns | Low |
| EA:EA+CHM | Some concerns | Low risk | No concerns | Major concerns | No concerns | No concerns | Low |
| EA:EA+WM | Some concerns | Low risk | No concerns | Major concerns | No concerns | No concerns | Low |
| EA:MA | Some concerns | Low risk | No concerns | Major concerns | No concerns | No concerns | Low |
| EA:MA+CHM | Some concerns | Low risk | No concerns | Major concerns | No concerns | No concerns | Low |
| EA:MOX | Some concerns | Low risk | No concerns | Major concerns | No concerns | No concerns | Low |
| EA:SMS | Some concerns | Low risk | No concerns | Major concerns | No concerns | No concerns | Low |
| EA:WMA | Some concerns | Low risk | No concerns | Major concerns | No concerns | No concerns | Low |
| EA:WMA+CHM | Some concerns | Low risk | No concerns | Major concerns | No concerns | No concerns | Low |
| EA:Z | Some concerns | Low risk | No concerns | Major concerns | No concerns | No concerns | Low |
| EA+CHM:EA+WM | Some concerns | Low risk | No concerns | Major concerns | No concerns | No concerns | Low |
| EA+CHM:MA | Some concerns | Low risk | No concerns | Major concerns | No concerns | No concerns | Low |
| EA+CHM:MA+CHM | Some concerns | Low risk | No concerns | Major concerns | No concerns | No concerns | Low |
| EA+CHM:MOX | Some concerns | Low risk | No concerns | Major concerns | No concerns | No concerns | Low |
| EA+CHM:SMS | Some concerns | Low risk | No concerns | Major concerns | No concerns | No concerns | Low |
| EA+CHM:WM | Some concerns | Low risk | No concerns | Major concerns | No concerns | No concerns | Low |
| EA+CHM:WMA | Some concerns | Low risk | No concerns | No concerns | Major concerns | No concerns | Low |
| EA+CHM:WMA+CHM | Some concerns | Low risk | No concerns | Major concerns | No concerns | No concerns | Low |
| EA+CHM:Z | Some concerns | Low risk | No concerns | Major concerns | No concerns | No concerns | Low |
| EA+WM:MA | Some concerns | Low risk | No concerns | Major concerns | No concerns | No concerns | Low |
| EA+WM:MA+CHM | Some concerns | Low risk | No concerns | Major concerns | No concerns | No concerns | Low |
| EA+WM:MOX | Some concerns | Low risk | No concerns | Major concerns | No concerns | No concerns | Low |
| EA+WM:SMS | Some concerns | Low risk | No concerns | Major concerns | No concerns | No concerns | Low |
| EA+WM:WMA | Some concerns | Low risk | No concerns | Major concerns | No concerns | No concerns | Low |
| EA+WM:WMA+CHM | Some concerns | Low risk | No concerns | Major concerns | No concerns | No concerns | Low |
| EA+WM:Z | Some concerns | Low risk | No concerns | Major concerns | No concerns | No concerns | Low |
| MA:MA+CHM | Some concerns | Low risk | No concerns | Major concerns | No concerns | No concerns | Low |
| MA:SMS | Some concerns | Low risk | No concerns | Major concerns | No concerns | No concerns | Low |
| MA:WMA+CHM | Some concerns | Low risk | No concerns | Major concerns | No concerns | No concerns | High |
| MA+CHM:MOX | Some concerns | Low risk | No concerns | Major concerns | No concerns | No concerns | Low |
| MA+CHM:SMS | Some concerns | Low risk | No concerns | Major concerns | No concerns | No concerns | High |
| MA+CHM:WM | Some concerns | Low risk | No concerns | No concerns | No concerns | No concerns | High |
| MA+CHM:WMA | Some concerns | Low risk | No concerns | Major concerns | No concerns | No concerns | Low |
| MA+CHM:WMA+CHM | Some concerns | Low risk | No concerns | Major concerns | No concerns | No concerns | High |
| MA+CHM:Z | Some concerns | Low risk | No concerns | Major concerns | No concerns | No concerns | Low |
| MOX:WMA+CHM | Some concerns | Low risk | No concerns | Major concerns | No concerns | No concerns | Low |
| MOX:Z | Some concerns | Low risk | No concerns | Major concerns | No concerns | No concerns | Low |
| SMS:WM | Some concerns | Low risk | No concerns | Major concerns | No concerns | No concerns | Low |
| SMS:WMA | Some concerns | Low risk | No concerns | No concerns | Major concerns | No concerns | Low |
| SMS:WMA+CHM | Some concerns | Low risk | No concerns | Major concerns | No concerns | No concerns | Low |
| SMS:Z | Some concerns | Low risk | No concerns | Major concerns | No concerns | No concerns | Low |
| WM:Z | Some concerns | Low risk | No concerns | Major concerns | No concerns | No concerns | Low |
| WMA:WMA+CHM | Some concerns | Low risk | No concerns | No concerns | Major concerns | No concerns | Low |
| WMA+CHM:Z | Some concerns | Low risk | No concerns | Major concerns | No concerns | No concerns | Low |

**Figure S8.** Risk of bias contribution by intervention group in median NIH-CPSI pain score.

**
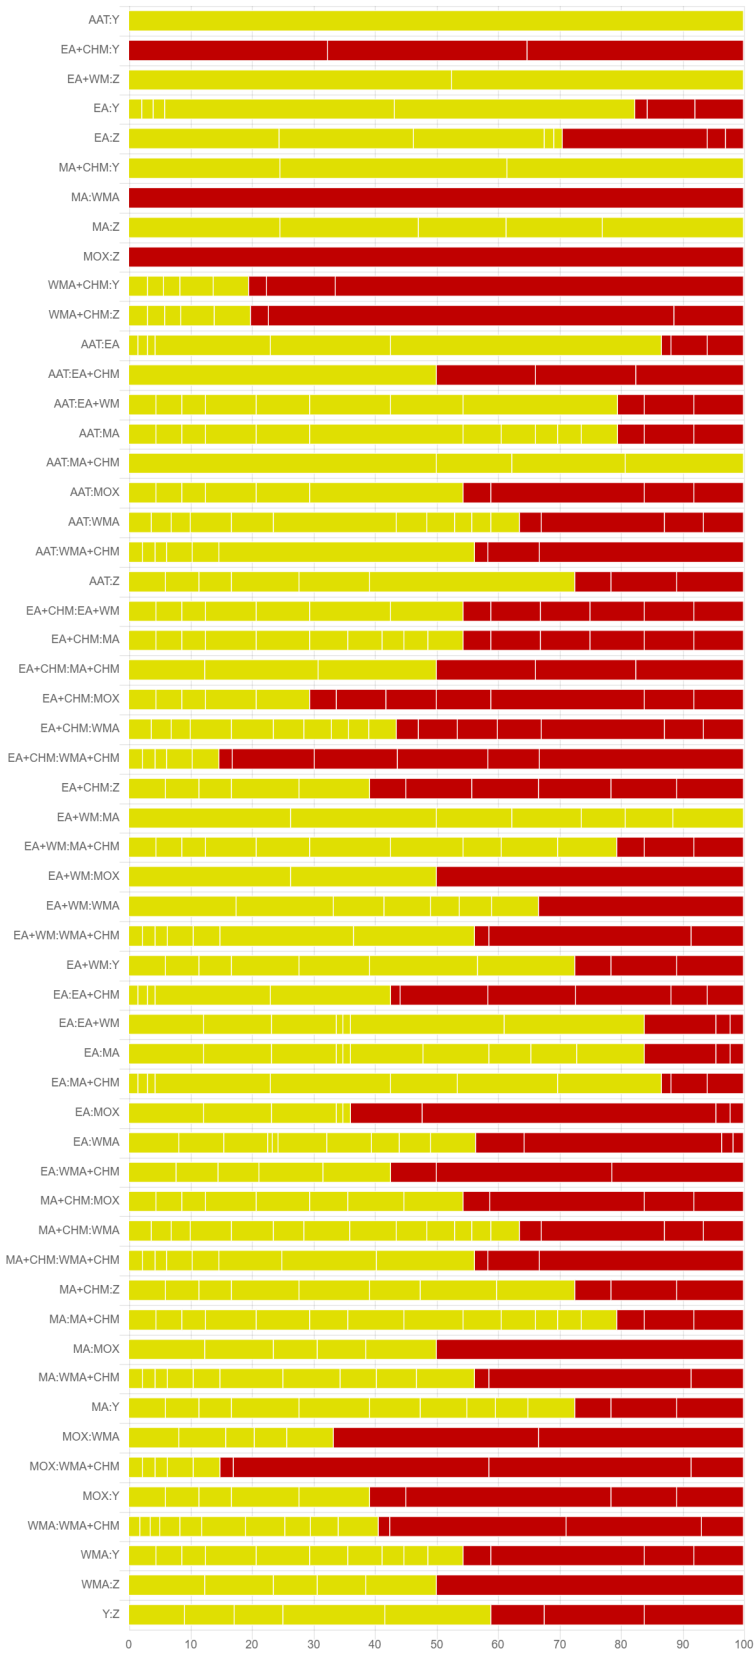

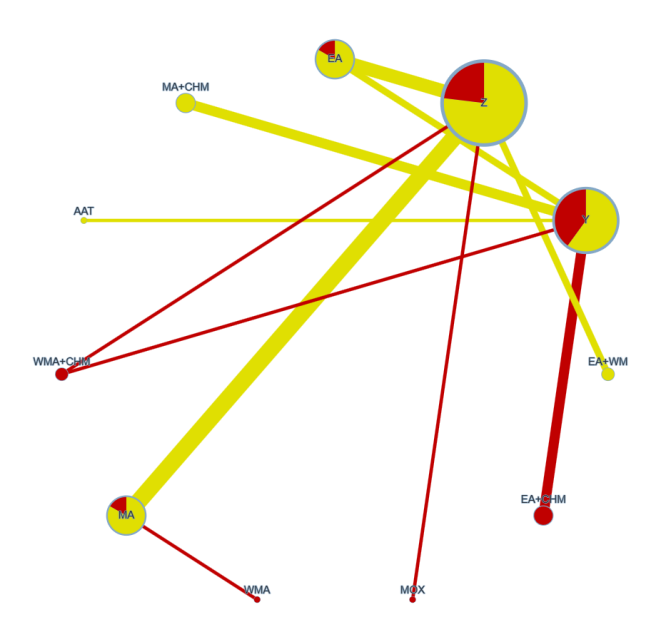
**

**Table S6.**CINeMA results of NIH-CPSI pain score.

| Comparison | Within-study bias | Reporting bias | Indirectness | Imprecision | Heterogeneity | Incoherence | Confidence rating |
| --- | --- | --- | --- | --- | --- | --- | --- |
| AAT:Y | Some concerns | Low risk | No concerns | No concerns | No concerns | No concerns | High |
| EA:Y | Some concerns | Low risk | No concerns | Major concerns | No concerns | No concerns | Low |
| EA:Z | Some concerns | Low risk | No concerns | No concerns | Major concerns | No concerns | Low |
| EA+CHM:Y | Major concerns | Low risk | No concerns | Major concerns | No concerns | No concerns | Low |
| EA+WM:Z | Some concerns | Low risk | No concerns | No concerns | Major concerns | No concerns | Low |
| MA:WMA | Major concerns | Low risk | No concerns | Major concerns | No concerns | No concerns | Low |
| MA:Z | Some concerns | Low risk | No concerns | No concerns | Major concerns | No concerns | Low |
| MA+CHM:Y | Some concerns | Low risk | No concerns | No concerns | Major concerns | No concerns | Low |
| MOX:Z | Major concerns | Low risk | No concerns | Major concerns | No concerns | No concerns | Low |
| WMA+CHM:Y | Major concerns | Low risk | No concerns | Major concerns | No concerns | No concerns | Low |
| WMA+CHM:Z | Major concerns | Low risk | No concerns | Major concerns | No concerns | No concerns | Low |
| AAT:EA | Some concerns | Low risk | No concerns | No concerns | No concerns | No concerns | Moderate |
| AAT:EA+CHM | Some concerns | Low risk | No concerns | No concerns | No concerns | No concerns | Moderate |
| AAT:EA+WM | Some concerns | Low risk | No concerns | No concerns | No concerns | No concerns | Moderate |
| AAT:MA | Some concerns | Low risk | No concerns | No concerns | No concerns | No concerns | Moderate |
| AAT:MA+CHM | Some concerns | Low risk | No concerns | No concerns | No concerns | No concerns | Moderate |
| AAT:MOX | Some concerns | Low risk | No concerns | No concerns | No concerns | No concerns | Moderate |
| AAT:WMA | Some concerns | Low risk | No concerns | No concerns | No concerns | No concerns | Moderate |
| AAT:WMA+CHM | Some concerns | Low risk | No concerns | No concerns | No concerns | No concerns | Moderate |
| AAT:Z | Some concerns | Low risk | No concerns | No concerns | No concerns | No concerns | Moderate |
| EA:EA+CHM | Major concerns | Low risk | No concerns | Major concerns | No concerns | No concerns | Very low |
| EA:EA+WM | Some concerns | Low risk | No concerns | Major concerns | No concerns | No concerns | Low |
| EA:MA | Some concerns | Low risk | No concerns | Major concerns | No concerns | No concerns | Low |
| EA:MA+CHM | Some concerns | Low risk | No concerns | Major concerns | No concerns | No concerns | Low |
| EA:MOX | Major concerns | Low risk | No concerns | Major concerns | No concerns | No concerns | Very low |
| EA:WMA | Some concerns | Low risk | No concerns | Major concerns | No concerns | No concerns | Low |
| EA:WMA+CHM | Major concerns | Low risk | No concerns | Major concerns | No concerns | No concerns | Very low |
| EA+CHM:EA+WM | Some concerns | Low risk | No concerns | Major concerns | No concerns | No concerns | Low |
| EA+CHM:MA | Some concerns | Low risk | No concerns | Major concerns | No concerns | No concerns | Low |
| EA+CHM:MA+CHM | Some concerns | Low risk | No concerns | Major concerns | No concerns | No concerns | Low |
| EA+CHM:MOX | Major concerns | Low risk | No concerns | Major concerns | No concerns | No concerns | Low |
| EA+CHM:WMA | Major concerns | Low risk | No concerns | Major concerns | No concerns | No concerns | Low |
| EA+CHM:WMA+CHM | Major concerns | Low risk | No concerns | Major concerns | No concerns | No concerns | Low |
| EA+CHM:Z | Major concerns | Low risk | No concerns | Major concerns | No concerns | No concerns | Low |
| EA+WM:MA | Some concerns | Low risk | No concerns | Major concerns | No concerns | No concerns | Low |
| EA+WM:MA+CHM | Some concerns | Low risk | No concerns | Major concerns | No concerns | No concerns | Low |
| EA+WM:MOX | Some concerns | Low risk | No concerns | Major concerns | No concerns | No concerns | Low |
| EA+WM:WMA | Some concerns | Low risk | No concerns | Major concerns | No concerns | No concerns | Low |
| EA+WM:WMA+CHM | Some concerns | Low risk | No concerns | Major concerns | No concerns | No concerns | Low |
| EA+WM:Y | Some concerns | Low risk | No concerns | Major concerns | No concerns | No concerns | Low |
| MA:MA+CHM | Some concerns | Low risk | No concerns | Major concerns | No concerns | No concerns | Low |
| MA:MOX | Some concerns | Low risk | No concerns | Major concerns | No concerns | No concerns | Low |
| MA:WMA+CHM | Some concerns | Low risk | No concerns | Major concerns | No concerns | No concerns | Low |
| MA:Y | Some concerns | Low risk | No concerns | Major concerns | No concerns | No concerns | High |
| MA+CHM:MOX | Some concerns | Low risk | No concerns | Major concerns | No concerns | No concerns | Low |
| MA+CHM:WMA | Some concerns | Low risk | No concerns | Major concerns | No concerns | No concerns | Low |
| MA+CHM:WMA+CHM | Some concerns | Low risk | No concerns | Major concerns | No concerns | No concerns | Low |
| MA+CHM:Z | Some concerns | Low risk | No concerns | No concerns | Major concerns | No concerns | Low |
| MOX:WMA | Major concerns | Low risk | No concerns | Major concerns | No concerns | No concerns | Very low |
| MOX:WMA+CHM | Major concerns | Low risk | No concerns | Major concerns | No concerns | No concerns | Very low |
| MOX:Y | Major concerns | Low risk | No concerns | Major concerns | No concerns | No concerns | High |
| WMA:WMA+CHM | Major concerns | Low risk | No concerns | Major concerns | No concerns | No concerns | Very low |
| WMA:Y | Some concerns | Low risk | No concerns | Major concerns | No concerns | No concerns | Low |
| WMA:Z | Some concerns | Low risk | No concerns | No concerns | Major concerns | No concerns | Low |
| Y:Z | Some concerns | Low risk | No concerns | Major concerns | No concerns | No concerns | Low |

**Figure S10.** Risk of bias contribution by intervention group in median NIH-CPSI voiding score.


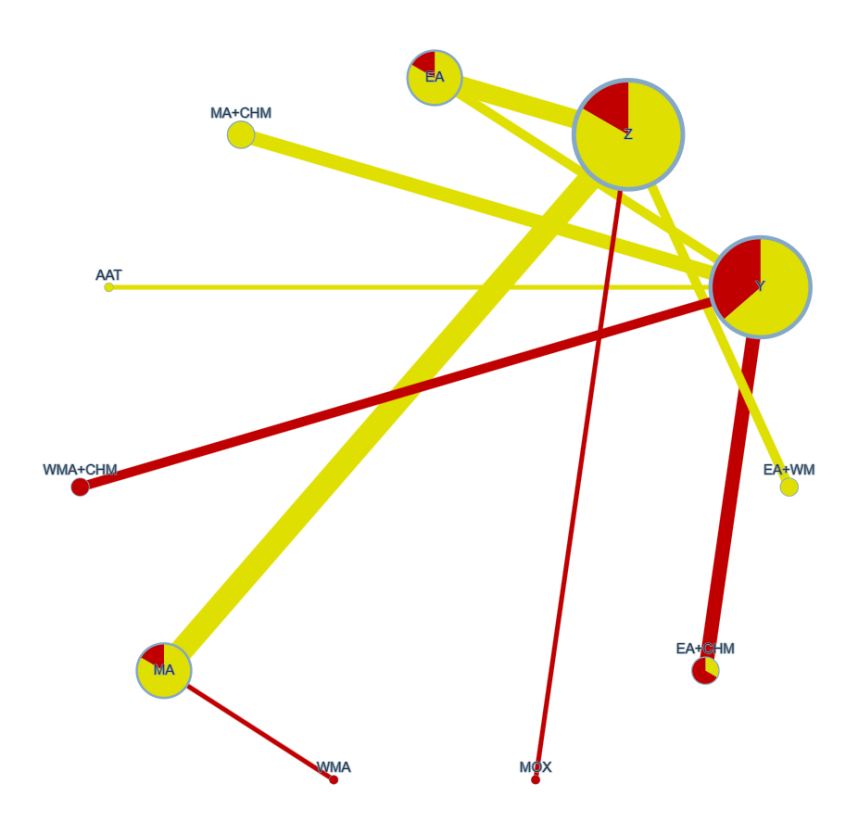


**Figure S11.** Overall risk of bias by treatment comparison in median NIH-CPSI voiding score.

**
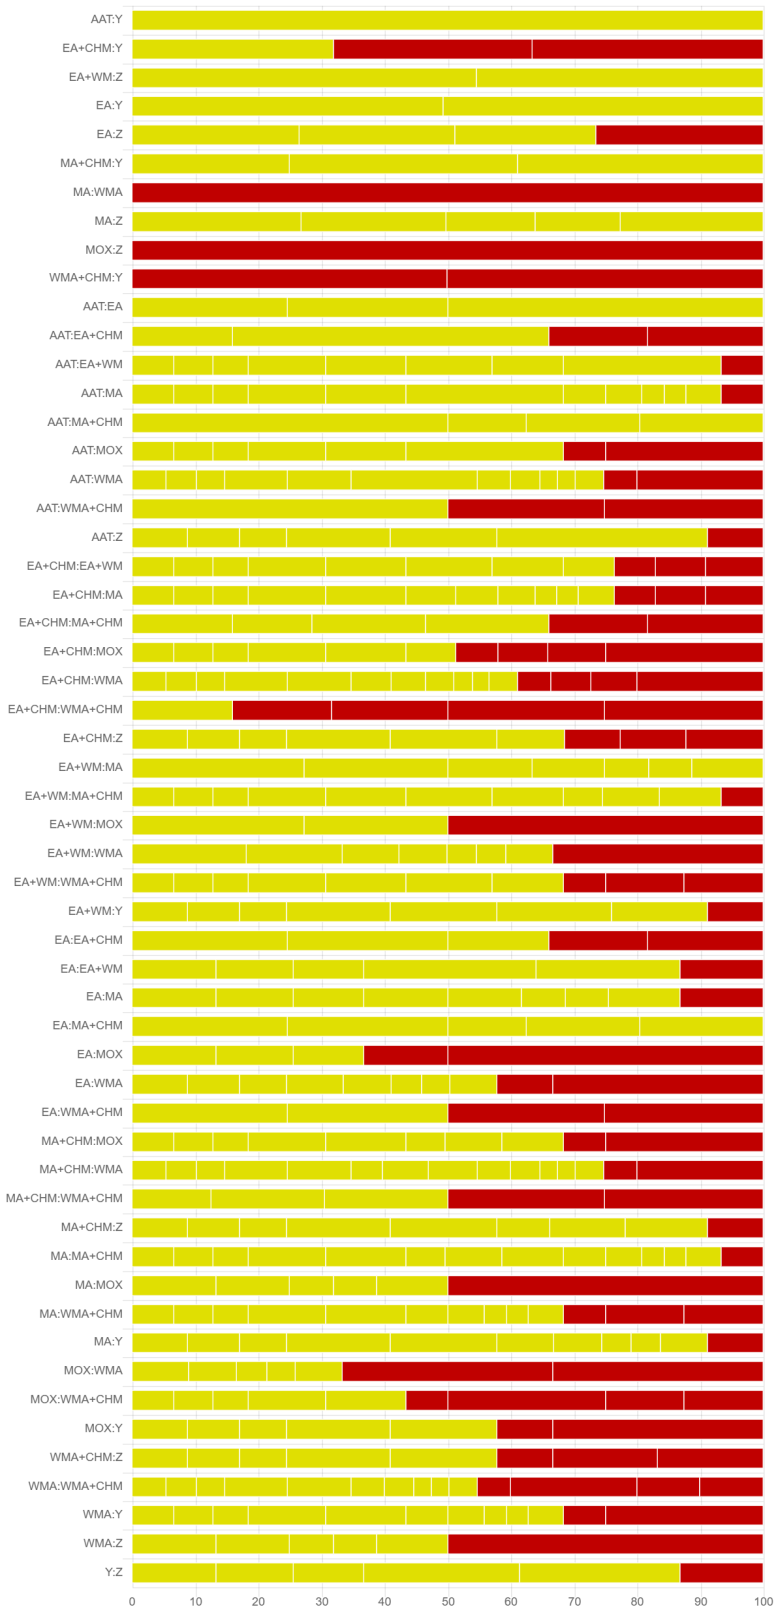
**

**Table S7.**CINeMA results of NIH-CPSI voiding score.

| Comparison | Within-study bias | Reporting bias | Indirectness | Imprecision | Heterogeneity | Incoherence | Confidence rating |
| --- | --- | --- | --- | --- | --- | --- | --- |
| AAT:Y | Some concerns | Low risk | No concerns | No concerns | No concerns | Major concerns | Low |
| EA:Y | Some concerns | Low risk | No concerns | Major concerns | No concerns | Major concerns | Low |
| EA:Z | Some concerns | Low risk | No concerns | No concerns | Major concerns | Major concerns | Very low |
| EA+CHM:Y | Major concerns | Low risk | No concerns | No concerns | Major concerns | Major concerns | Very low |
| EA+WM:Z | Some concerns | Low risk | No concerns | No concerns | Major concerns | Major concerns | Very low |
| MA:WMA | Major concerns | Low risk | No concerns | Major concerns | No concerns | Major concerns | Very low |
| MA:Z | Some concerns | Low risk | No concerns | Major concerns | No concerns | Major concerns | Very low |
| MA+CHM:Y | Some concerns | Low risk | No concerns | No concerns | Major concerns | Major concerns | Very low |
| MOX:Z | Major concerns | Low risk | No concerns | Major concerns | No concerns | Major concerns | Very low |
| WMA+CHM:Y | Major concerns | Low risk | No concerns | No concerns | Major concerns | Major concerns | Very low |
| AAT:EA | Some concerns | Low risk | No concerns | No concerns | No concerns | Major concerns | Low |
| AAT:EA+CHM | Some concerns | Low risk | No concerns | No concerns | No concerns | Major concerns | Low |
| AAT:EA+WM | Some concerns | Low risk | No concerns | No concerns | No concerns | Major concerns | Low |
| AAT:MA | Some concerns | Low risk | No concerns | No concerns | No concerns | Major concerns | Low |
| AAT:MA+CHM | Some concerns | Low risk | No concerns | No concerns | No concerns | Major concerns | Low |
| AAT:MOX | Some concerns | Low risk | No concerns | No concerns | No concerns | Major concerns | Low |
| AAT:WMA | Some concerns | Low risk | No concerns | No concerns | No concerns | Major concerns | Low |
| AAT:WMA+CHM | Some concerns | Low risk | No concerns | No concerns | No concerns | Major concerns | Low |
| AAT:Z | Some concerns | Low risk | No concerns | No concerns | No concerns | Major concerns | High |
| EA:EA+CHM | Some concerns | Low risk | No concerns | Major concerns | No concerns | Major concerns | Very low |
| EA:EA+WM | Some concerns | Low risk | No concerns | Major concerns | No concerns | Major concerns | Very low |
| EA:MA | Some concerns | Low risk | No concerns | Major concerns | No concerns | Major concerns | Very low |
| EA:MA+CHM | Some concerns | Low risk | No concerns | Major concerns | No concerns | Major concerns | Very low |
| EA:MOX | Major concerns | Low risk | No concerns | Major concerns | No concerns | Major concerns | Very low |
| EA:WMA | Some concerns | Low risk | No concerns | Major concerns | No concerns | Major concerns | Very low |
| EA:WMA+CHM | Some concerns | Low risk | No concerns | Major concerns | No concerns | Major concerns | Very low |
| EA+CHM:EA+WM | Some concerns | Low risk | No concerns | Major concerns | No concerns | Major concerns | Very low |
| EA+CHM:MA | Some concerns | Low risk | No concerns | Major concerns | No concerns | Major concerns | Very low |
| EA+CHM:MA+CHM | Some concerns | Low risk | No concerns | Major concerns | No concerns | Major concerns | Very low |
| EA+CHM:MOX | Some concerns | Low risk | No concerns | Major concerns | No concerns | Major concerns | Very low |
| EA+CHM:WMA | Some concerns | Low risk | No concerns | Major concerns | No concerns | Major concerns | Very low |
| EA+CHM:WMA+CHM | Major concerns | Low risk | No concerns | Major concerns | No concerns | Major concerns | Very low |
| EA+CHM:Z | Some concerns | Low risk | No concerns | No concerns | Major concerns | Major concerns | Very low |
| EA+WM:MA | Some concerns | Low risk | No concerns | Major concerns | No concerns | Major concerns | Very low |
| EA+WM:MA+CHM | Some concerns | Low risk | No concerns | Major concerns | No concerns | Major concerns | Very low |
| EA+WM:MOX | Some concerns | Low risk | No concerns | Major concerns | No concerns | Major concerns | Very low |
| EA+WM:WMA | Some concerns | Low risk | No concerns | Major concerns | No concerns | Major concerns | Very low |
| EA+WM:WMA+CHM | Some concerns | Low risk | No concerns | Major concerns | No concerns | Major concerns | Very low |
| EA+WM:Y | Some concerns | Low risk | No concerns | Major concerns | No concerns | Major concerns | Very low |
| MA:MA+CHM | Some concerns | Low risk | No concerns | No concerns | Major concerns | Major concerns | High |
| MA:MOX | Some concerns | Low risk | No concerns | Major concerns | No concerns | Major concerns | Very low |
| MA:WMA+CHM | Some concerns | Low risk | No concerns | Major concerns | No concerns | Major concerns | Very low |
| MA:Y | Some concerns | Low risk | No concerns | Major concerns | No concerns | Major concerns | Very low |
| MA+CHM:MOX | Some concerns | Low risk | No concerns | Major concerns | No concerns | Major concerns | Very low |
| MA+CHM:WMA | Some concerns | Low risk | No concerns | Major concerns | No concerns | Major concerns | Very low |
| MA+CHM:WMA+CHM | Some concerns | Low risk | No concerns | Major concerns | No concerns | Major concerns | Very low |
| MA+CHM:Z | Some concerns | Low risk | No concerns | No concerns | No concerns | Major concerns | Low |
| MOX:WMA | Major concerns | Low risk | No concerns | Major concerns | No concerns | Major concerns | Very low |
| MOX:WMA+CHM | Major concerns | Low risk | No concerns | Major concerns | No concerns | Major concerns | Very low |
| MOX:Y | Some concerns | Low risk | No concerns | Major concerns | No concerns | Major concerns | Very low |
| WMA:WMA+CHM | Some concerns | Low risk | No concerns | Major concerns | No concerns | Major concerns | Very low |
| WMA:Y | Some concerns | Low risk | No concerns | Major concerns | No concerns | Major concerns | Very low |
| WMA:Z | Some concerns | Low risk | No concerns | Major concerns | No concerns | Major concerns | Very low |
| WMA+CHM:Z | Some concerns | Low risk | No concerns | No concerns | Major concerns | Major concerns | Very low |
| Y:Z | Some concerns | Low risk | No concerns | Major concerns | No concerns | Major concerns | Very low |

**Figure S12.** Risk of bias contribution by intervention group in median NIH-CPSI quality of life score.


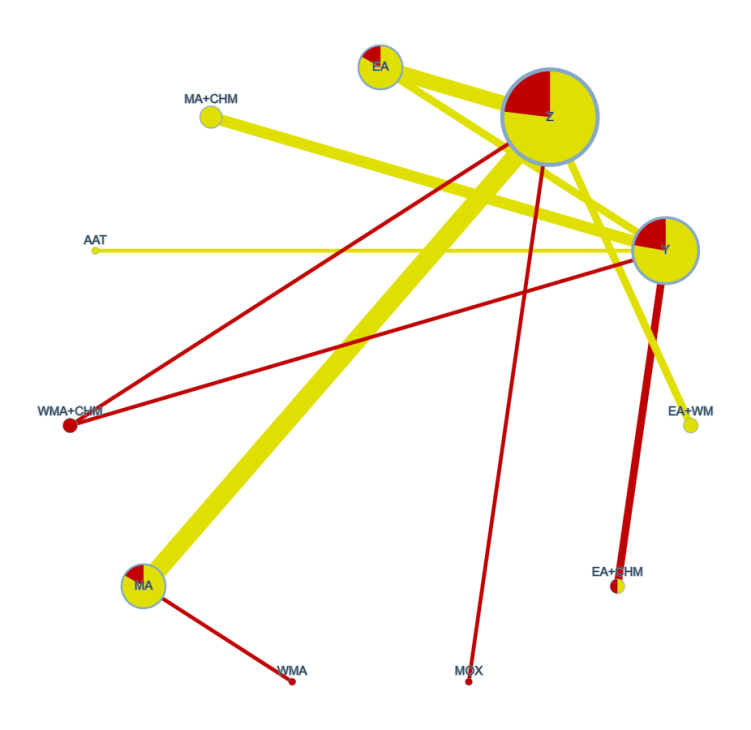


**Figure S13.** Overall risk of bias by treatment comparison in median NIH-CPSI quality of life score.**
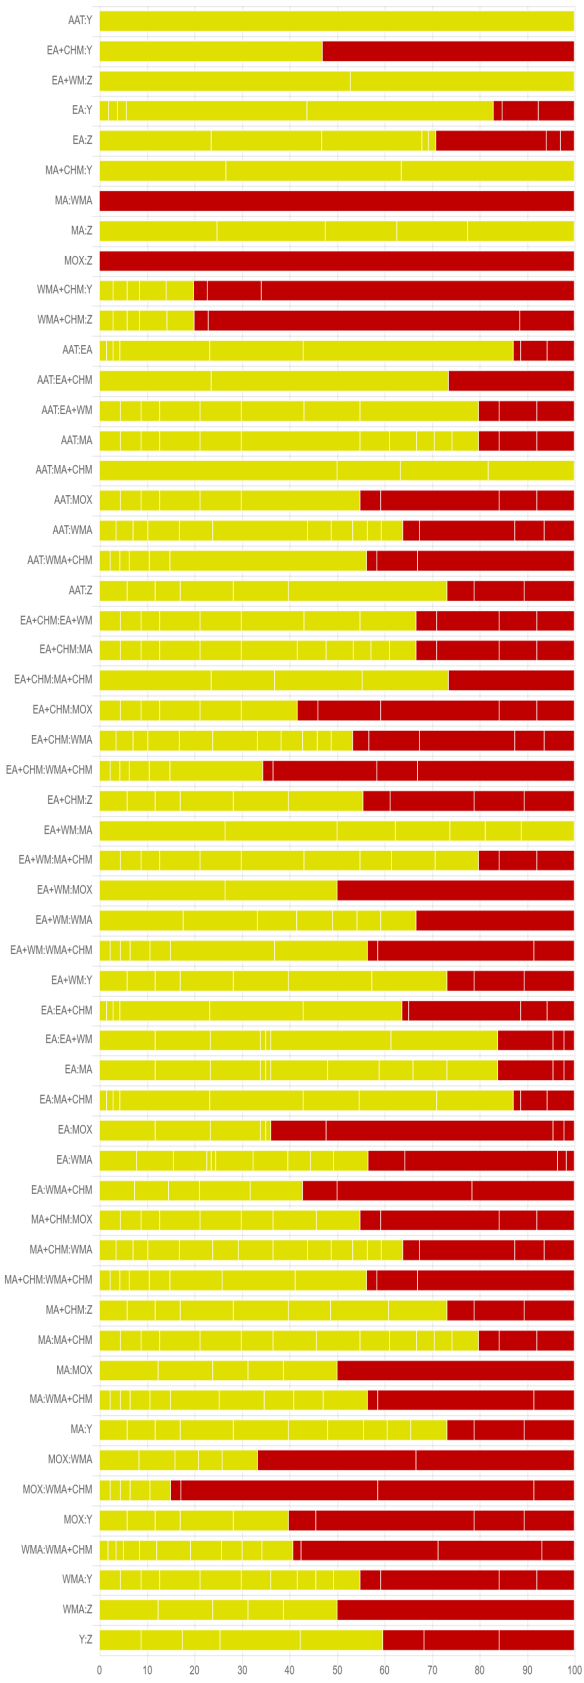
**

**Table S8.**CINeMA results of NIH-CPSI quality of life score.

| Comparison | Within-study bias | Reporting bias | Indirectness | Imprecision | Heterogeneity | Incoherence | Confidence rating |
| --- | --- | --- | --- | --- | --- | --- | --- |
| AAT:Y | Some concerns | Low risk | No concerns | No concerns | No concerns | No concerns | High |
| EA:Y | Some concerns | Low risk | No concerns | Major concerns | No concerns | No concerns | Low |
| EA:Z | Some concerns | Low risk | No concerns | No concerns | Major concerns | No concerns | Low |
| EA+CHM:Y | Major concerns | Low risk | No concerns | Major concerns | No concerns | No concerns | Very low |
| EA+WM:Z | Some concerns | Low risk | No concerns | Major concerns | No concerns | No concerns | Low |
| MA:WMA | Major concerns | Low risk | No concerns | Major concerns | No concerns | No concerns | Very low |
| MA:Z | Some concerns | Low risk | No concerns | Major concerns | No concerns | No concerns | Low |
| MA+CHM:Y | Some concerns | Low risk | No concerns | No concerns | Major concerns | No concerns | Low |
| MOX:Z | Major concerns | Low risk | No concerns | Major concerns | No concerns | No concerns | Very low |
| WMA+CHM:Y | Major concerns | Low risk | No concerns | Major concerns | No concerns | No concerns | Very low |
| WMA+CHM:Z | Major concerns | Low risk | No concerns | Major concerns | No concerns | No concerns | Very low |
| AAT:EA | Some concerns | Low risk | No concerns | No concerns | No concerns | No concerns | Moderate |
| AAT:EA+CHM | Some concerns | Low risk | No concerns | No concerns | No concerns | No concerns | Moderate |
| AAT:EA+WM | Some concerns | Low risk | No concerns | No concerns | No concerns | No concerns | Moderate |
| AAT:MA | Some concerns | Low risk | No concerns | No concerns | No concerns | No concerns | Moderate |
| AAT:MA+CHM | Some concerns | Low risk | No concerns | No concerns | No concerns | No concerns | High |
| AAT:MOX | Some concerns | Low risk | No concerns | No concerns | No concerns | No concerns | Moderate |
| AAT:WMA | Some concerns | Low risk | No concerns | No concerns | No concerns | No concerns | Moderate |
| AAT:WMA+CHM | Some concerns | Low risk | No concerns | No concerns | No concerns | No concerns | Moderate |
| AAT:Z | Some concerns | Low risk | No concerns | No concerns | No concerns | No concerns | Moderate |
| EA:EA+CHM | Some concerns | Low risk | No concerns | Major concerns | No concerns | No concerns | Low |
| EA:EA+WM | Some concerns | Low risk | No concerns | Major concerns | No concerns | No concerns | Low |
| EA:MA | Some concerns | Low risk | No concerns | Major concerns | No concerns | No concerns | Low |
| EA:MA+CHM | Some concerns | Low risk | No concerns | Major concerns | No concerns | No concerns | Low |
| EA:MOX | Major concerns | Low risk | No concerns | Major concerns | No concerns | No concerns | Very low |
| EA:WMA | Some concerns | Low risk | No concerns | Major concerns | No concerns | No concerns | Low |
| EA:WMA+CHM | Major concerns | Low risk | No concerns | Major concerns | No concerns | No concerns | Low |
| EA+CHM:EA+WM | Some concerns | Low risk | No concerns | Major concerns | No concerns | No concerns | Low |
| EA+CHM:MA | Some concerns | Low risk | No concerns | Major concerns | No concerns | No concerns | Low |
| EA+CHM:MA+CHM | Some concerns | Low risk | No concerns | Major concerns | No concerns | No concerns | Low |
| EA+CHM:MOX | Major concerns | Low risk | No concerns | Major concerns | No concerns | No concerns | Very low |
| EA+CHM:WMA | Some concerns | Low risk | No concerns | Major concerns | No concerns | No concerns | Low |
| EA+CHM:WMA+CHM | Major concerns | Low risk | No concerns | Major concerns | No concerns | No concerns | Very low |
| EA+CHM:Z | Some concerns | Low risk | No concerns | Major concerns | No concerns | No concerns | Low |
| EA+WM:MA | Some concerns | Low risk | No concerns | Major concerns | No concerns | No concerns | Low |
| EA+WM:MA+CHM | Some concerns | Low risk | No concerns | Major concerns | No concerns | No concerns | Low |
| EA+WM:MOX | Some concerns | Low risk | No concerns | Major concerns | No concerns | No concerns | Low |
| EA+WM:WMA | Some concerns | Low risk | No concerns | Major concerns | No concerns | No concerns | Low |
| EA+WM:WMA+CHM | Some concerns | Low risk | No concerns | Major concerns | No concerns | No concerns | Low |
| EA+WM:Y | Some concerns | Low risk | No concerns | Major concerns | No concerns | No concerns | Low |
| MA:MA+CHM | Some concerns | Low risk | No concerns | Major concerns | No concerns | No concerns | Low |
| MA:MOX | Major concerns | Low risk | No concerns | Major concerns | No concerns | No concerns | Very low |
| MA:WMA+CHM | Some concerns | Low risk | No concerns | Major concerns | No concerns | No concerns | Low |
| MA:Y | Some concerns | Low risk | No concerns | Major concerns | No concerns | No concerns | Low |
| MA+CHM:MOX | Some concerns | Low risk | No concerns | Major concerns | No concerns | No concerns | Low |
| MA+CHM:WMA | Some concerns | Low risk | No concerns | Major concerns | No concerns | No concerns | Low |
| MA+CHM:WMA+CHM | Some concerns | Low risk | No concerns | Major concerns | No concerns | No concerns | Low |
| MA+CHM:Z | Some concerns | Low risk | No concerns | No concerns | Major concerns | No concerns | Low |
| MOX:WMA | Major concerns | Low risk | No concerns | Major concerns | No concerns | No concerns | Very low |
| MOX:WMA+CHM | Major concerns | Low risk | No concerns | Major concerns | No concerns | No concerns | Very low |
| MOX:Y | Major concerns | Low risk | No concerns | Major concerns | No concerns | No concerns | Very low |
| WMA:WMA+CHM | Major concerns | Low risk | No concerns | Major concerns | No concerns | No concerns | Very low |
| WMA:Y | Some concerns | Low risk | No concerns | Major concerns | No concerns | No concerns | High |
| WMA:Z | Major concerns | Low risk | No concerns | Major concerns | No concerns | No concerns | Very low |
| Y:Z | Some concerns | Low risk | No concerns | Major concerns | No concerns | No concerns | Low |

- **Reporting bias:** We judged it visually by a funnel plot (**Appendix 4**).
- **Indirectness:** Transferability assumptions were assessed based on the baseline characteristics summarized in the **study characteristics table** provided in the intervention table.
- **Imprecision:** We used the CINeMA web application to evaluate the precision of each comparison, following its built-in criteria and grading system.
- **Heterogeneity:** We assessed concerns about heterogeneity by examining 95% confidence intervals (CIs) within a clinical reasoning framework similar to that used for evaluating imprecision. Specifically, we evaluated whether the CIs and prediction intervals included or excluded clinically important effect sizes, using predefined thresholds for clinical significance. The evaluation was guided by the recommendations automatically generated by CINeMA (https://cinema.ispm.unibe.ch/).

**Inconsistency:** To assess inconsistency, we reviewed the results of Consistency analyses **(Appendix 3)**. Inconsistency was considered substantial when the p-value was less than 0.10; otherwise, no significant inconsistency was assumed.

**Appendix 6. SUCRA Plots**

**Figure S14.** SUCRA plot of NIH-CPSI Total Score.

**
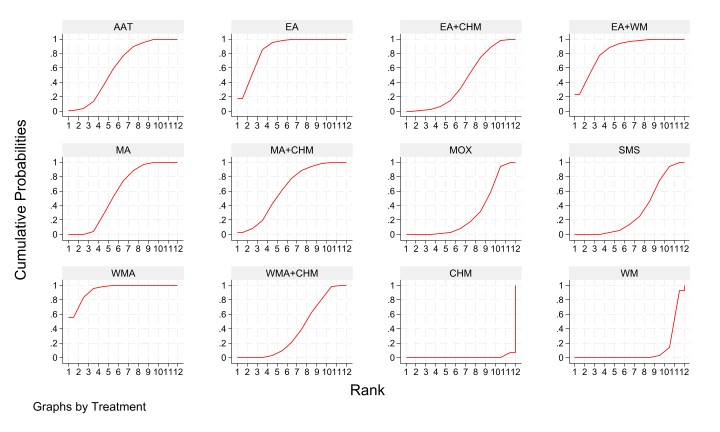
**

**Table S9.** SUCRA ranking results for NIH-CPSI total score.

| Treatment | SUCRA | PrBest | MeanRank |
| --- | --- | --- | --- |
| AAT | 61.1 | 1.1 | 5.3 |
| EA | 86.2 | 17.9 | 2.5 |
| EA+CHM | 43.1 | 0.1 | 7.3 |
| EA+WM | 84.1 | 22.1 | 2.8 |
| MA | 58.6 | 0 | 5.6 |
| MA+CHM | 62.9 | 2.5 | 5.1 |
| MOX | 28 | 0 | 8.9 |
| SMS | 32.6 | 0 | 8.4 |
| WMA | 94.1 | 56.3 | 1.6 |
| WMA+CHM | 38.5 | 0 | 7.8 |
| CHM | 0.7 | 0 | 11.9 |
| WM | 10 | 0 | 10.9 |

**Figure S15.** SUCRA plot of pain score**.**

**
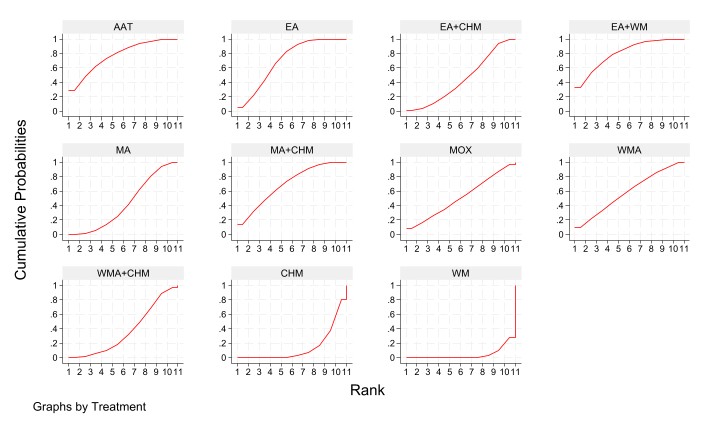
**

**Table S10.** SUCRA ranking results for NIH-CPSI pain score.

| Treatment | SUCRA | PrBest | MeanRank |
| --- | --- | --- | --- |
| AAT | 76.6 | 29.2 | 3.3 |
| EA | 71.5 | 5.8 | 3.8 |
| EA+CHM | 43.4 | 0.9 | 6.7 |
| EA+WM | 80.4 | 32.1 | 3 |
| MA | 42.9 | 0.2 | 6.7 |
| MA+CHM | 69.3 | 12.3 | 4.1 |
| MOX | 52 | 8.6 | 5.8 |
| WMA | 58.2 | 10.4 | 5.2 |
| WMA+CHM | 36.8 | 0.5 | 7.3 |
| CHM | 14.5 | 0 | 9.5 |
| WM | 4.0 | 0 | 10.6 |

**Figure S16.** SUCRA plot of voiding score**.**

**
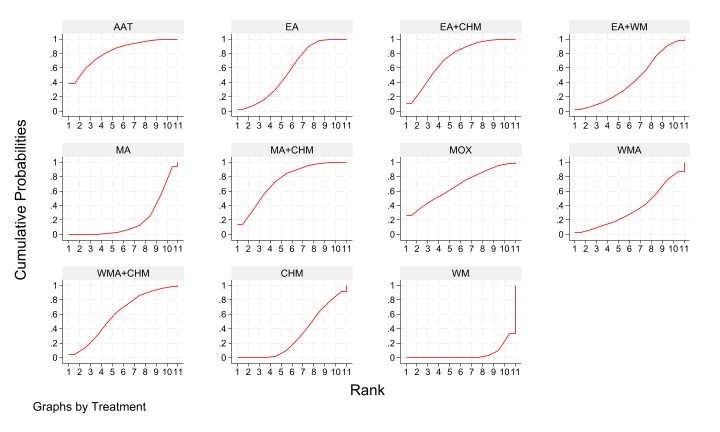
**

**Table S11.** SUCRA ranking results for voiding score.

| Treatment | SUCRA | PrBest | MeanRank |
| --- | --- | --- | --- |
| AAT | 83.4 | 39.4 | 2.7 |
| EA | 56.5 | 1.5 | 5.3 |
| EA+CHM | 72.8 | 11.3 | 3.7 |
| EA+WM | 43.2 | 2.2 | 6.7 |
| MA | 19.5 | 0 | 9.1 |
| MA+CHM | 73.7 | 12.2 | 3.6 |
| MOX | 67.5 | 26 | 4.2 |
| WMA | 36.5 | 2.7 | 7.4 |
| WMA+CHM | 60.6 | 4.8 | 4.9 |
| CHM | 31.4 | 0 | 7.9 |
| WM | 4.7 | 0 | 10.5 |

**Figure S17.** SUCRA plot of qualityoflife score.

**
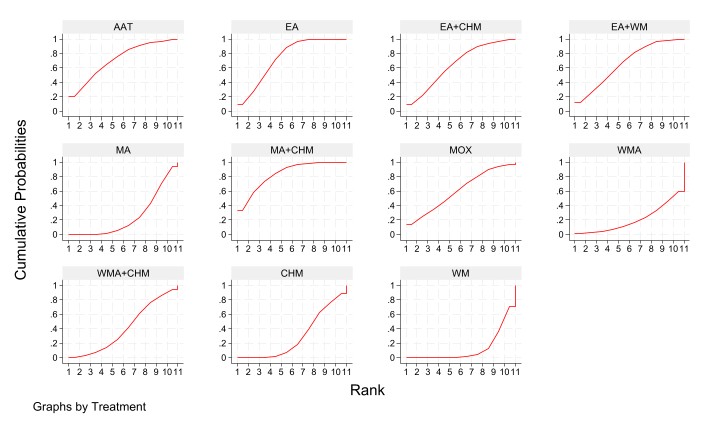
**

**Table S12.** SUCRA ranking results for qualityoflife score.

| Treatment | SUCRA | PrBest | MeanRank |
| --- | --- | --- | --- |
| AAT | 71.8 | 20.6 | 3.8 |
| EA | 74.6 | 9.3 | 3.5 |
| EA+CHM | 65 | 8.7 | 4.5 |
| EA+WM | 66.1 | 12.5 | 4.4 |
| MA | 24.6 | 0 | 8.5 |
| MA+CHM | 83.6 | 33.1 | 2.6 |
| MOX | 60.7 | 14.3 | 4.9 |
| WMA | 20.4 | 0.8 | 9 |
| WMA+CHM | 41.5 | 0.7 | 6.8 |
| CHM | 29.3 | 0 | 8.1 |
| WM | 12.7 | 0 | 9.7 |

**Figure S18.** SUCRA plot of Response Rate**.**

**
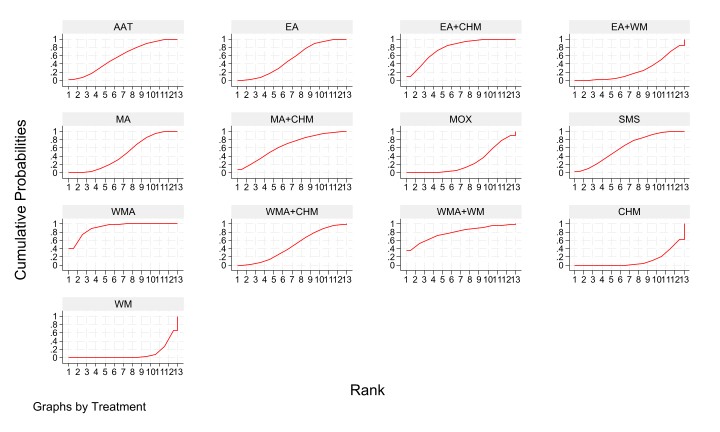
**

**Table S13.** SUCRA ranking results for response rate.

| Treatment | SUCRA | PrBest | MeanRank |
| --- | --- | --- | --- |
| AAT | 57.4 | 1.7 | 6.1 |
| EA | 51.9 | 0.1 | 6.8 |
| EA+CHM | 77.6 | 10.2 | 3.7 |
| EA+WM | 25.4 | 0 | 10 |
| MA | 46.6 | 0 | 7.4 |
| MA+CHM | 65.3 | 7 | 5.2 |
| MOX | 26 | 0 | 9.9 |
| SMS | 61.7 | 2.1 | 5.6 |
| WMA | 91.4 | 42.9 | 2 |
| WMA+CHM | 47.2 | 0.4 | 7.3 |
| WMA+WM | 79 | 35.5 | 3.5 |
| CHM | 11.9 | 0 | 11.6 |
| WM | 8.5 | 0 | 12 |

**Appendix 7. League Tables**

**Table S14.**League table of NIH-CPSI Total Score.

| AAT |  |  |  |  |  |  |  |  |  |  |  |
| --- | --- | --- | --- | --- | --- | --- | --- | --- | --- | --- | --- |
| 1.66  (-0.77,4.09) | EA |  |  |  |  |  |  |  |  |  |  |
| -0.92  (-3.05,1.21) | -2.58  (-5.09,-0.07) | EA+CHM |  |  |  |  |  |  |  |  |  |
| 1.62  (-1.40,4.63) | -0.04  (-2.72,2.64) | 2.54 (-0.57,5.64) | EA+WM |  |  |  |  |  |  |  |  |
| -0.12  (-2.35,2.11) | -1.78  (-3.61,0.06) | 0.80 (-1.53,3.13) | -1.74 (-4.18,0.71) | MA |  |  |  |  |  |  |  |
| 0.08  (-2.32,2.49) | -1.57  (-4.32,1.17) | 1.01 (-1.24,3.25) | -1.53 (-4.84,1.78) | 0.20 (-2.39,2.80) | MA+CHM |  |  |  |  |  |  |
| -1.78  (-4.24,0.68) | -3.43  -5.74,-1.13) | -0.85 (-3.34,1.63) | -3.39 (-6.24,-0.55) | -1.66 (-3.60,0.29) | -1.86 (-4.59,0.87) | MOX |  |  |  |  |  |
| -1.50  (-3.86,0.85) | -3.16  -5.64,-0.69) | -0.58 (-2.86,1.70) | -3.12 (-6.16,-0.08) | -1.38 (-3.61,0.84) | -1.59 (-4.13,0.96) | 0.27 (-1.62,2.16) | SMS |  |  |  |  |
| 2.42  (-0.19,5.04) | 0.76  (-1.51,3.04) | 3.34 (0.64,6.04) | 0.80 (-1.99,3.60) | 2.54 (0.83,4.25) | 2.34 (-0.59,5.27) | 4.20 (1.93,6.46) | 3.93 (1.36,6.49) | WMA |  |  |  |
| -1.17  (-3.46,1.12) | -2.83  (-5.11,-0.55) | -0.25 (-2.50,2.01) | -2.79 (-5.65,0.08) | -1.05 (-3.10,1.00) | -1.25 (-3.78,1.27) | 0.61 (-1.77,2.98) | 0.33 (-2.04,2.71) | -3.59 (-6.05,-1.13) | WMA+CHM |  |  |
| -4.39  -6.02,-2.75) | -6.05  (-8.15,-3.95) | -3.47 (-4.84,-2.09) | -6.00 (-8.80,-3.21) | -4.27 (-6.16,-2.37) | -4.47 (-6.24,-2.70) | -2.61 (-4.70,-0.53) | -2.88 (-4.72,-1.05) | -6.81 (-9.14,-4.48) | -3.22 (-5.01,-1.42) | CHM |  |
| -3.13  -5.18,-1.07) | -4.78  (-6.30,-3.27) | -2.20 (-4.39,-0.02) | -4.74 (-6.94,-2.54) | -3.01 (-4.07,-1.95) | -3.21 (-5.68,-0.74) | -1.35 (-3.16,0.46) | -1.62 (-3.71,0.47) | -5.55 (-7.27,-3.83) | -1.96 (-3.78,-0.13) | 1.26 (-0.46,2.98) | WM |

Footnote: The columns represent the comparison of the row intervention to the column intervention. The rows represent the comparison of the row intervention to other interventions. The effect estimates are expressed as mean difference and 95% confidence interval. Mean difference <0 favors the intervention in the row. Values highlighted in red indicate statistically significant comparisons, defined as 95% confidence intervals that did not include 0.

**Table S15.**League table ofpain score.

| AAT |  |  |  |  |  |  |  |  |  |  |
| --- | --- | --- | --- | --- | --- | --- | --- | --- | --- | --- |
| -0.35 (-2.94,2.24) | EA |  |  |  |  |  |  |  |  |  |
| -1.32 (-3.55,0.91) | -0.97 (-3.19,1.24) | EA+CHM |  |  |  |  |  |  |  |  |
| 0.15 (-3.02,3.32) | 0.50 (-1.53,2.52) | 1.47 (-1.40,4.34) | EA+WM |  |  |  |  |  |  |  |
| -1.29 (-4.13,1.55) | -0.94 (-2.40,0.52) | 0.03 (-2.48,2.54) | -1.44 (-3.46,0.58) | MA |  |  |  |  |  |  |
| -0.35 (-2.63,1.92) | -0.01 (-2.27,2.26) | 0.97 (-0.87,2.80) | -0.50 (-3.42,2.41) | 0.94 (-1.61,3.49) | MA+CHM |  |  |  |  |  |
| -0.98 (-4.50,2.53) | -0.63 (-3.17,1.90) | 0.34 (-2.91,3.59) | -1.13 (-4.02,1.76) | 0.31 (-2.22,2.84) | -0.63 (-3.91,2.66) | MOX |  |  |  |  |
| -0.76 (-4.17,2.64) | -0.41 (-2.79,1.97) | 0.56 (-2.57,3.69) | -0.91 (-3.67,1.85) | 0.53 (-1.35,2.41) | -0.41 (-3.57,2.76) | 0.22 (-2.93,3.37) | WMA |  |  |  |
| -1.57 (-4.08,0.95) | -1.22 (-3.15,0.72) | -0.25 (-2.36,1.87) | -1.72 (-4.27,0.83) | -0.28 (-2.40,1.85) | -1.21 (-3.38,0.96) | -0.58 (-3.55,2.38) | -0.81 (-3.64,2.03) | WMA+CHM |  |  |
| -2.42 (-4.26,-0.58) | -2.07 (-3.90,-0.25) | -1.10 (-2.35,0.15) | -2.57 (-5.15,0.02) | -1.13 (-3.30,1.04) | -2.06 (-3.41,-0.72) | -1.44 (-4.44,1.56) | -1.66 (-4.53,1.21) | -0.85 (-2.56,0.86) | CHM |  |
| -3.13 (-5.78,-0.48) | -2.78 (-3.82,-1.75) | -1.81 (-4.10,0.47) | -3.28 (-5.02,-1.55) | -1.84 (-2.87,-0.81) | -2.78 (-5.11,-0.44) | -2.15 (-4.46,0.16) | -2.37 (-4.51,-0.23) | -1.57 (-3.43,0.30) | -0.71 (-2.63,1.20) | WM |

Footnote: The columns represent the comparison of the row intervention to the column intervention. The rows represent the comparison of the row intervention to other interventions. The effect estimates are expressed as mean difference and 95% confidence interval. Mean difference <0 favors the intervention in the row. Values highlighted in red indicate statistically significant comparisons, defined as 95% confidence intervals that did not include 0.

**Table S16.**League table of voiding score.

|  |  |  |  |  |  |  |  |  |  |  |
| --- | --- | --- | --- | --- | --- | --- | --- | --- | --- | --- |
| AAT |  |  |  |  |  |  |  |  |  |  |
| -1.03 (-3.15,1.08) | EA |  |  |  |  |  |  |  |  |  |
| -0.44 (-2.23,1.35) | 0.59  (-1.19,2.37) | EA+CHM |  |  |  |  |  |  |  |  |
| -1.44 (-4.01,1.12) | -0.41 (-1.86,1.04) | -1.00 (-3.30,1.29) | EA+WM |  |  |  |  |  |  |  |
| -2.19 (-4.62,0.24) | -1.16 (-2.35,0.03) | -1.75 (-3.90,0.40) | -0.75 (-2.17,0.67) | MA |  |  |  |  |  |  |
| -0.40 (-2.20,1.40) | 0.63  (-1.15,2.42) | 0.04  (-1.34,1.43) | 1.05  (-1.25,3.34) | 1.79 (-0.35,3.94) | MA+CHM |  |  |  |  |  |
| -0.56 (-3.64,2.52) | 0.47  (-1.77,2.71) | -0.12 (-2.98,2.75) | 0.88  (-1.49,3.26) | 1.63 (-0.59,3.86) | -0.16 (-3.03,2.70) | MOX |  |  |  |  |
| -1.74 (-4.62,1.14) | -0.71 (-2.66,1.24) | -1.30 (-3.94,1.35) | -0.30 (-2.40,1.80) | 0.45 (-1.09,2.00) | -1.34 (-3.99,1.30) | -1.18 (-3.89,1.53) | WMA |  |  |  |
| -0.81 (-2.68,1.07) | 0.22  (-1.64,2.09) | -0.36 (-1.84,1.12) | 0.64  (-1.72,3.00) | 1.39 (-0.83,3.60) | -0.41 (-1.90,1.08) | -0.25 (-3.16,2.67) | 0.93 (-1.76,3.63) | WMA+CHM |  |  |
| -1.60 (-3.11,-0.09) | -0.57 (-2.06,0.92) | -1.16 (-2.13,-0.19) | -0.16 (-2.23,1.92) | 0.59 (-1.32,2.50) | -1.20 (-2.18,-0.22) | -1.04 (-3.73,1.65) | 0.14 (-2.31,2.60) | -0.79 (-1.91,0.32) | CHM |  |
| -2.71 (-4.99,-0.42) | -1.68 (-2.54,-0.81) | -2.27 (-4.25,-0.29) | -1.27 (-2.43,-0.10) | -0.52 (-1.33,0.30) | -2.31 (-4.29,-0.33) | -2.15 (-4.22,-0.08) | -0.97 (-2.72,0.78) | -1.90 (-3.96,0.15) | -1.11 (-2.83,0.61) | WM |

Footnote: The columns represent the comparison of the row intervention to the column intervention. The rows represent the comparison of the row intervention to other interventions. The effect estimates are expressed as mean difference and 95% confidence interval. Mean difference <0 favors the intervention in the row. Values highlighted in red indicate statistically significant comparisons, defined as 95% confidence intervals that did not include 0.

**Table S17.**League table of quality of life score.

| AAT |  |  |  |  |  |  |  |  |  |  |
| --- | --- | --- | --- | --- | --- | --- | --- | --- | --- | --- |
| -0.08 (-2.33,2.18) | EA |  |  |  |  |  |  |  |  |  |
| -0.28 (-2.49,1.93) | -0.20 (-2.23,1.82) | EA+CHM |  |  |  |  |  |  |  |  |
| -0.30 (-3.04,2.44) | -0.23 (-1.92,1.47) | -0.02 (-2.58,2.53) | EA+WM |  |  |  |  |  |  |  |
| -1.69 (-4.19,0.81) | -1.62 (-2.89,-0.34) | -1.41 (-3.71,0.88) | -1.39 (-3.06,0.27) | MA |  |  |  |  |  |  |
| 0.38 (-1.67,2.44) | 0.46  (-1.40,2.32) | 0.66 (-1.14,2.46) | 0.68 (-1.74,3.11) | 2.08 (-0.07,4.22) | MA+CHM |  |  |  |  |  |
| -0.43 (-3.50,2.63) | -0.36 (-2.54,1.83) | -0.16 (-3.06,2.75) | -0.13 (-2.56,2.30) | 1.26 (-0.90,3.42) | -0.82 (-3.60,1.97) | MOX |  |  |  |  |
| -2.00 (-5.09,1.08) | -1.93 (-4.14,0.28) | -1.72 (-4.64,1.19) | -1.70 (-4.16,0.75) | -0.31 (-2.11,1.49) | -2.38 (-5.19,0.42) | -1.57 (-4.38,1.24) | WMA |  |  |  |
| -1.10 (-3.42,1.22) | -1.02 (-2.74,0.69) | -0.82 (-2.92,1.28) | -0.80 (-2.99,1.40) | 0.59 (-1.29,2.48) | -1.48 (-3.42,0.45) | -0.67 (-3.26,1.93) | 0.90 (-1.71,3.51) | WMA+CHM |  |  |
| -1.41 (-3.12,0.30) | -1.34 (-2.81,0.14) | -1.13 (-2.53,0.27) | -1.11 (-3.25,1.03) | 0.28 (-1.54,2.11) | -1.79 (-2.93,-0.66) | -0.98 (-3.52,1.57) | 0.59 (-1.98,3.16) | -0.31 (-1.88,1.26) | CHM |  |
| -2.02 (-4.37,0.32) | -1.95 (-2.88,-1.02) | -1.75 (-3.87,0.38) | -1.72 (-3.14,-0.30) | -0.33 (-1.20,0.54) | -2.41 (-4.37,-0.44) | -1.59 (-3.57,0.39) | -0.02 (-2.02,1.98) | -0.92 (-2.60,0.75) | -0.61 (-2.22,0.99) | WM |

Footnote: The columns represent the comparison of the row intervention to the column intervention. The rows represent the comparison of the row intervention to other interventions. The effect estimates are expressed as mean difference and 95% confidence interval. Mean difference <0 favors the intervention in the row. Values highlighted in red indicate statistically significant comparisons, defined as 95% confidence intervals that did not include 0.

**Table S18.**League table of Response rate.

| AAT |  |  |  |  |  |  |  |  |  |  |  |  |
| --- | --- | --- | --- | --- | --- | --- | --- | --- | --- | --- | --- | --- |
| 1.02 (0.85,1.22) | EA |  |  |  |  |  |  |  |  |  |  |  |
| 0.93 (0.78,1.11) | 0.91 (0.76,1.10) | EA+CHM |  |  |  |  |  |  |  |  |  |  |
| 1.11 (0.90,1.37) | 1.09 (0.92,1.28) | 1.19 (0.96,1.48) | EA+WM |  |  |  |  |  |  |  |  |  |
| 1.03 (0.87,1.23) | 1.01 (0.90,1.14) | 1.11 (0.93,1.33) | 0.93 (0.80,1.09) | MA |  |  |  |  |  |  |  |  |
| 0.97 (0.78,1.20) | 0.95 (0.76,1.18) | 1.04 (0.87,1.25) | 0.87 (0.68,1.11) | 0.93 (0.75,1.16) | MA+CHM |  |  |  |  |  |  |  |
| 1.10 (0.91,1.33) | 1.08 (0.93,1.26) | 1.18 (0.98,1.42) | 0.99 (0.82,1.19) | 1.06 (0.92,1.23) | 1.14 (0.91,1.42) | MOX |  |  |  |  |  |  |
| 0.98 (0.81,1.20) | 0.97 (0.81,1.16) | 1.06 (0.88,1.27) | 0.89 (0.72,1.09) | 0.95 (0.80,1.13) | 1.02 (0.82,1.26) | 0.89 (0.79,1.02) | SMS |  |  |  |  |  |
| 0.87 (0.71,1.05) | 0.85 (0.73,0.98) | 0.93 (0.76,1.13) | 0.78 (0.65,0.93) | 0.84 (0.75,0.94) | 0.90 (0.71,1.13) | 0.79 (0.67,0.92) | 0.88 (0.73,1.06) | WMA |  |  |  |  |
| 1.03 (0.85,1.25) | 1.01 (0.85,1.20) | 1.11 (0.93,1.32) | 0.93 (0.76,1.14) | 1.00 (0.84,1.18) | 1.07 (0.87,1.31) | 0.94 (0.78,1.12) | 1.05 (0.87,1.27) | 1.19 (0.99,1.43) | WMA+CHM |  |  |  |
| 0.90 (0.66,1.22) | 0.88 (0.66,1.16) | 0.96 (0.71,1.31) | 0.81 (0.60,1.08) | 0.87 (0.66,1.14) | 0.93 (0.66,1.29) | 0.81 (0.61,1.09) | 0.91 (0.67,1.24) | 1.03 (0.77,1.38) | 0.87 (0.64,1.17) | WMA+WM |  |  |
| 1.16 (1.00,1.35) | 1.14 (0.97,1.34) | 1.25 (1.12,1.39) | 1.05 (0.86,1.27) | 1.12 (0.96,1.31) | 1.20 (1.03,1.39) | 1.05 (0.90,1.24) | 1.18 (1.01,1.38) | 1.34 (1.12,1.60) | 1.13 (0.97,1.30) | 1.30 (0.96,1.75) | CHM |  |
| 1.17 (1.00,1.37) | 1.15 (1.04,1.26) | 1.25 (1.06,1.48) | 1.05 (0.92,1.20) | 1.13 (1.05,1.22) | 1.21 (0.98,1.48) | 1.06 (0.93,1.20) | 1.19 (1.01,1.39) | 1.35 (1.20,1.51) | 1.13 (0.98,1.31) | 1.30 (1.00,1.70) | 1.01 (0.87,1.16) | WM |

Footnote: The columns represent the comparison of the row intervention to the column intervention. The rows represent the comparison of the row intervention to other interventions. The effect estimates are expressed as risk ratio and 95% confidence interval. Risk ratio <1 favors the intervention in the row. Values highlighted in red indicate statistically significant comparisons, defined as 95% confidence intervals that did not include 1.
